1 **Full title:** Schizophrenia and human self-domestication: an evolutionary linguistics approach

2 **Short title** (to be used as running head): Schizophrenia and human-self domestication

3 Antonio Benítez-Burraco<sup>1\*</sup>, Lorena Di Pietro<sup>2</sup>, Marta Barba<sup>2</sup>, and Wanda Lattanzi<sup>2</sup>

4

5 1. Department of Philology, University of Huelva, Huelva, Spain

6 2. Institute of Anatomy and Cell Biology, Università Cattolica del Sacro Cuore, Rome, Italy

7

8 **Keywords:** schizophrenia, domestication, neural crest, language impairment, language  
9 evolution, candidate genes, gene expression profile.

10

11 Number of tables: 1

12 Number of figures: 4

13

14

15 \* Corresponding author

16 Antonio Benítez Burraco

17 Departamento de Filología

18 Facultad de Humanidades

19 Campus de “El Carmen”

20 Universidad de Huelva

21 Avda. de las Fuerzas Armadas s/n

22 21071-Huelva (Spain)

23 Telephone number: 0034 959 219 113

24 Email: [antonio.benitez@dfesp.uhu.es](mailto:antonio.benitez@dfesp.uhu.es)

25

26 **Abstract**

27

28 Schizophrenia (SZ) is a pervasive neurodevelopmental disorder entailing social and cognitive  
29 deficits, including marked problems with language. Its complex multifactorial  
30 etiopathogenesis, including genetic and environmental factors, is still widely uncertain. SZ  
31 incidence has always been high and quite stable in human populations, across time and  
32 regardless of cultural implications, due to unclear reasons. It has been hypothesised that SZ  
33 pathophysiology may involve the biological components that changed during the recent human  
34 evolutionary history and led to our distinctive mode of cognition, which includes language  
35 skills. In this paper we explore this possibility, focusing on the self-domestication of the human  
36 species. This has been claimed to account for many human-specific distinctive traits, including  
37 aspects of our behaviour and cognition, and to favour the emergence of complex languages  
38 through cultural evolution. The “domestication syndrome” in mammals comprises the  
39 constellation of traits exhibited by domesticated strains, seemingly resulting from the  
40 hypofunction of the neural crest. It is our intention to show that people with SZ exhibit more  
41 marked domesticated traits at the morphological, physiological, and behavioural levels. We  
42 also show that genes involved in domestication and neural crest development and function  
43 comprise nearly 20% SZ candidates, most of which exhibit altered expression profiles in the  
44 brain of SZ patients, specifically in areas involved in language processing. Based on these  
45 observations, we conclude that SZ may represent an abnormal ontogenetic itinerary for the  
46 human faculty of language, resulting, at least in part, from changes in genes important for the  
47 “domestication syndrome” and, primarily involving the neural crest.

48

## 49 1. Introduction

50

51 Schizophrenia (SZ) is a pervasive neurodevelopmental condition entailing different and severe  
52 social and cognitive deficits. Core distinctive symptoms of SZ include delusions,  
53 hallucinations, impaired motivation, reduction in spontaneous speech, and social withdrawal;  
54 cognitive impairment, episodes of elated mood, and episodes of depressive mood are also  
55 commonly observed (van Os and Kapur 2009, Owen et al., 2016). SZ prevalence has been  
56 found stable across time and cultures, to the extent that it has been considered a human-specific  
57 disease. Indeed, susceptibility genes are poorly conserved across species, some of them being  
58 absent in great apes (Brüne, 2004, Pearlson and Folley, 2008). Also, most of the biological  
59 components that seem to have played a central role in the evolution of human cognition are  
60 found impaired in SZ patients. For instance, after our split from great apes, the frontal cortical  
61 circuitry was remodelled; this circuitry is responsible for many human-specific cognitive  
62 abilities and is found dysfunctional in patients with SZ and other psychiatric conditions (Teffer  
63 and Semendeferi, 2012). Likewise, genomic regions that have undergone positive selection in  
64 anatomically-modern humans (AMHs) are enriched in gene loci associated with SZ (Srinivasan  
65 et al., 2016). This enrichment has been recently linked to functional elements like introns and  
66 untranslated regions (Srinivasan et al., 2017). This rises the intriguing possibility that most of  
67 SZ risk alleles appeared more recently in human evolution. Overall, these evidences suggest  
68 that the evolutionary changes occurred in the human lineage, particularly after the split from  
69 extinct hominins, may help clarifying some aspects of SZ. On the other hand, delving into the  
70 SZ polygenic etiopathogenesis, which acts synergistically with unclear environmental factors,  
71 might help understand the changes that brought about our human distinctive cognitive  
72 phenotype, including our language abilities.

73

74 Language deficits are a hallmark of SZ, which has been defined as “the price that homo sapiens  
75 pays for language” (Crow, 2000). These usually manifest as problems in speech perception (in  
76 the form of auditory verbal hallucinations), abnormal speech production (known as Formal  
77 Thought Disorder, FTD), and production of abnormal linguistic content (that is, delusions)  
78 (Stephane et al., 2007, and 2014). These major positive symptoms can be reduced to  
79 disturbances in linguistic computation (Hinzen and Roselló 2015) that result from atypical  
80 brain development and wiring during growth (Li et al., 2009, and 2012). In our previous work  
81 we have showed that this abnormal mode of processing language can be specifically drawn  
82 back to an abnormal, distinctive oscillatory profile of the brain during language computation  
83 (Murphy and Benítez-Burraco, 2016a). Also, we have showed that candidates for SZ are  
84 overrepresented among the genes believed to be involved in the evolution of our language-  
85 readiness, that is, our species-specific ability to learn and use languages (Boeckx and Benítez-  
86 Burraco, 2014a, 2014b; Benítez-Burraco and Boeckx, 2015, Murphy and Benítez-Burraco,  
87 2016a).

88

89 Besides the genomic and epigenomic changes that favoured our speciation, we expect that our  
90 cognitive phenotype was also modelled by changes occurred later, during our self-  
91 domestication (Benítez-Burraco et al., 2016a). The idea of human beings as domesticated  
92 primates can be drawn back to Darwin (1871). Recent comparisons with extinct hominins have  
93 revealed that AMHs exhibit a number of domesticated traits, including differences in the brain  
94 and the face, changes in dentition, reduction of aggressiveness, and retention of juvenile  
95 characteristics (see Thomas, 2014 for details). Many authors have argued that the relaxation of  
96 the selective pressures on our species resulting from this process of self-domestication may  
97 have contributed to the creation of the cultural niche that favoured the emergence of modern  
98 languages (Hare and Tomasello, 2005, Deacon, 2009, Thomas, 2014, among others). This

99 niche provides humans with an extended socialization window, enabling them to receive a  
100 greater amount of linguistic stimuli, to involve in enhanced and prolonged communication  
101 exchanges with other conspecifics, and to experiment with language for a longer time. In  
102 particular, language complexity is expected to increase in these comfortable conditions, as  
103 attested by domestic strains of songbirds, in which domestication triggers variation and  
104 complexity in their songs (Takahasi and Okanoya, 2010, Kagawa et al., 2012). Importantly,  
105 this possibility is supported by several linguistic studies revealing positive correlations between  
106 aspects of linguistic complexity and aspects of social complexity (Wray and Grace, 2007,  
107 Lupyan and Dale, 2010), or pointing out to the emergent nature of core properties of human  
108 languages, resulting from cultural transmission (Benítez-Burraco, 2016).

109  
110 Several selectionist accounts of why humans became self-domesticated have been posited over  
111 time, ranging from selection against aggression and towards social tolerance, to a by-product  
112 of mate-choices, to adaptation to the human-made environment (Thomas, 2014). In our recent  
113 work we have hypothesised that self-domestication might be (also) a by-product of the changes  
114 that brought about our more globular skull/brain and our language-readiness (Benítez-Burraco  
115 et al., 2016a). The reason is that candidates for globularization and language-readiness are  
116 found among (and interact with) the genes believed important for the development and function  
117 of the neural crest (NC). And as noted by Wilkins et al (2014), the set of traits observed in  
118 domestic mammals, ranging from changes in the craniofacial region, to changes in the skin,  
119 the reproductive and vital cycles, and behaviour (the so-called ‘domestication syndrome’), may  
120 result from the hypofunction of the NC, in turn triggered by the selection for tameness (see  
121 Sánchez-Villagra et al., 2016, for a recent account).

122  
123 Building on this hypothesis, in our previous work we have showed that the complex  
124 pathophysiology of some human cognitive diseases entailing problems with language can be,  
125 at least in part, linked to an abnormal presentation of the “domestication syndrome” (Murphy  
126 and Benítez-Burraco, 2016a). Specifically, we have discussed how patients suffering from  
127 autism spectrum disorders (ASD) exhibit a plethora of distinctive behavioural, neurological,  
128 and physical anomalies, including dysmorphic features, that seem to be opposite as the  
129 “domesticated” traits observed in typically-developing (TD) individuals (Benítez-Burraco et  
130 al., 2016b).

131  
132 Interestingly, ASD and SZ have been hypothesised to be opposite poles in the continuum of  
133 cognitive modes, encompassing also the TD one. Their opposed natures can be tracked from  
134 brain structure and function to neurodevelopmental paths, to cognitive abilities (Crespi and  
135 Badcock, 2008). We have previously shown as well that SZ and ASD patients process language  
136 differently, and exhibit distinctive, disorder-specific oscillatory profiles when computing  
137 language (Murphy and Benítez-Burraco, 2016b). Similarly to SZ, language deficits in ASD can  
138 be linked to many of the changes occurred during our speciation, to the extent that candidates  
139 for this condition are also overrepresented among the genes believed to account for the  
140 evolution of our language-readiness (see Benítez-Burraco and Murphy, 2016).

141  
142 In this paper we wish to explore the possibility that SZ patients exhibit exacerbated, disease-  
143 specific signatures of the “domestication syndrome”. If we are right, our hypothesis could pave  
144 the way towards exploring the etiopathogenesis of SZ, and related language impairment, under  
145 an original standpoint. To this aim, we begin providing a general account of the domesticated  
146 traits found in SZ patients. Thereafter, we will focus on the molecular etiopathogenesis of SZ  
147 and check whether genes that have been found involved in the domestication process are  
148 somehow represented among SZ candidates. Considering the relevant role of the neural NC in

149 the domestication process, we also consider, in this search, genes involved in NC development  
150 and function. Through this comparative evaluation of candidates, we will define a subset of  
151 overlapping genes involved in both SZ and in domestication and/or NC. The functional role of  
152 these selected genes will be discussed in detail, focusing on their contribution to  
153 etiopathogenesis of SZ and their implication for cognition and language. In addition, in order  
154 to evaluate their actual functional involvement, we will delve into their differential expression  
155 profiles in the SZ brain, by *in silico* analysis of previously published data.

156

157 Environmental factors are known to contribute to SZ too (see Brown, 2011; Geoffroy et al.,  
158 2013; Moran et al., 2016, for reviews). Likewise, although domestication has genetic roots (as  
159 originally suggested by Wilkins et al. and as we will show here), domestication results as well  
160 in the creation of a cultural niche that favours the maintenance of domestic features by cultural  
161 evolution. Accordingly, although our focus is put on the genes, the role of the environment  
162 cannot be dismissed. The same is true for language indeed, as suggested above. Modern  
163 language seemingly evolved as the result of changes in brain genes that brought about a  
164 differential cognitive ability (aka *language-readiness*) and favoured a domesticated phenotype  
165 in our species, but it is also a consequence of subsequent changes in the (proto)linguistic  
166 systems, that were triggered and facilitated by the domestic environment in which human  
167 beings are reared.

168

## 169 **2. Domestication features in SZ**

170

171 Most of the features observed in the “domestication syndrome” described by Wilkins and  
172 colleagues (2014) are found generally exacerbated in SZ individuals (Figure 1). Domestic  
173 varieties of mammals exhibit a distinctive set of common traits (Figure 1, top), including  
174 neoteny, shorter reproductive cycles, depigmentation, and increased tameness. Changes in  
175 behaviour seemingly result from reduced levels of stress hormones (including  
176 adrenocorticoids, adrenocorticotrophic hormone, cortisol, and corticosterone), and particularly,  
177 from the delay in the maturation of the adrenal glands, which also gives rise to an increase of  
178 the duration of the immaturity of the hypothalamic-pituitary-adrenal system (the HPA axis)  
179 and a hypofunction of the sympathetic nervous system, which provides the animal with a longer  
180 socialization window. Many of the differences with their wild conspecifics concern to the  
181 craniofacial area. These include changes in ear size and shape, changes in the orofacial area  
182 (including shorter snouts and smaller jaws), changes in dentition (particularly, smaller teeth),  
183 and a reduced brain capacity (specifically, of components of the forebrain such as the amygdala  
184 or parts of the limbic system) (see Wilkins et al., 2014 and Sánchez-Villagra et al., 2016 for  
185 details). Below we provide with a detailed description of domestication traits commonly found  
186 in schizophrenic patients (Figure 1, down).

187

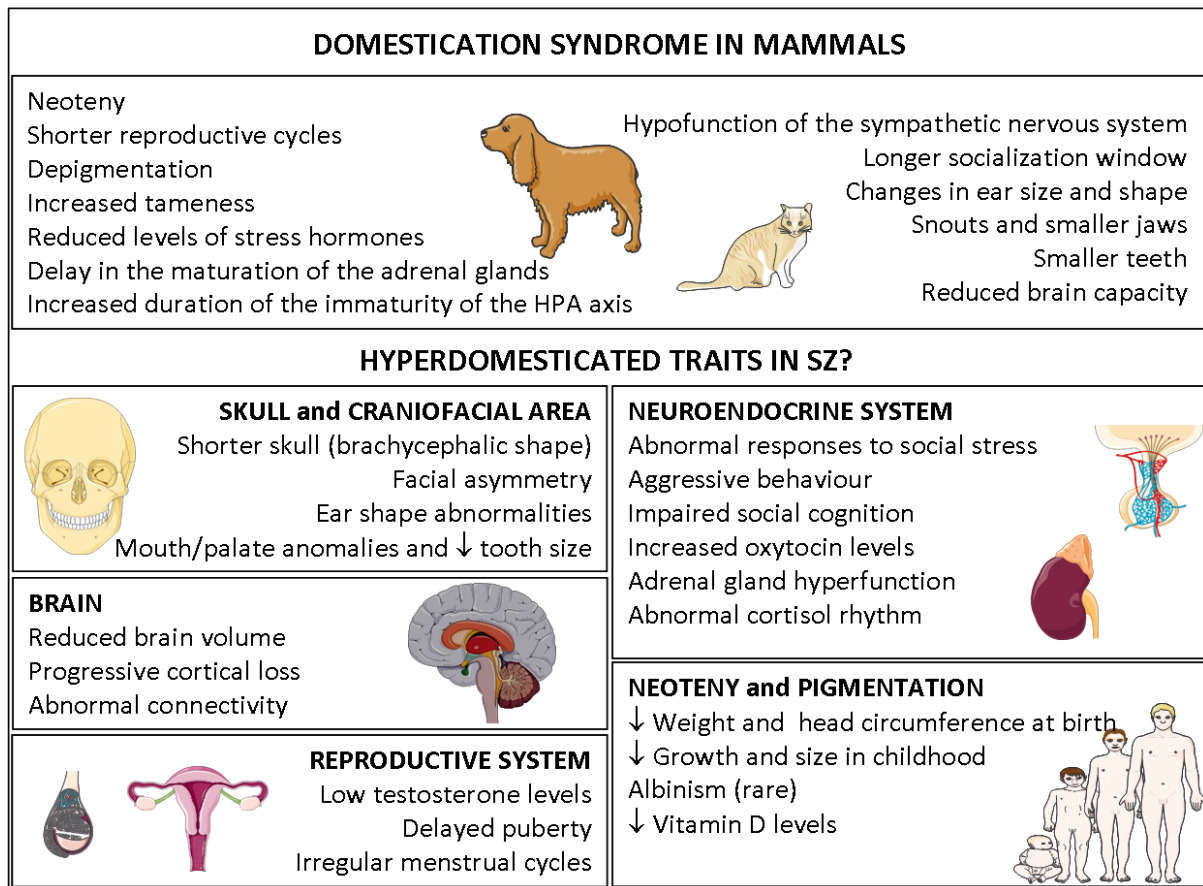

188  
189  
190  
191  
192  
193  
194  
195

**Figure 1. Schizophrenia and the domestication syndrome.** The diagram is meant to symbolize the anomalous presentation of the “domestication syndrome” in people with schizophrenia. Main features observed in domesticated mammals (Wilkins et al., 2014, Sánchez-Villagra, 2016) are shown in the upper box, while selected clinical findings from the SZ spectrum, that may resemble «hyper-domesticated traits», are categorized below. Pictures were gathered and modified from “Slide kit Servier Medical Art” (available at [www.servier.com](http://www.servier.com)).

196

### 197 *Physical anomalies*

198 Minor dysmorphisms are typically featured in the craniofacial area of SZ patients. Indeed,  
199 facial asymmetries, particularly those arising along the midfacial junctions (between  
200 frontonasal and maxillary prominence derivatives), are reproducibly found in these patients  
201 (Gourion et al., 2004, Deutsch et al., 2015). Additionally, ear shape abnormalities (including  
202 adherent ear lobes, lower edges of the ears extending backward/upward, malformed ears,  
203 asymmetrical ears, or cuspidal ears) are usually observed in SZ phenotypes (Yoshitsugu et al.,  
204 2006, Akabaliev et al., 2011, Lin et al., 2012). Some of these features (like prominent crux of  
205 helix and ear lobe crease, or primitive shape of the ear) are considered as pathognomonic for  
206 SZ in the differential diagnosis of psychotic conditions (Trixler et al., 2001, Praharaaj et al.,  
207 2012). Anomalies in the mouth (e.g. decreased tooth size, abnormal palate shape and size) are  
208 also commonly observed in schizophrenics (Ismail et al., 1998, Rajchgot et al., 2009, Hajnal  
209 et al., 2016). Likewise, the odds of having a psychotic disorder seem to be increased in people  
210 with shorter and wider palates (McGrath et al., 2002). More generally, the odds of having a  
211 psychotic disorder seem to be increased in people with smaller lower-facial heights (glabella  
212 to subnasal) (McGrath et al., 2002). Some studies suggest a significant association between  
213 minor physical anomalies and the early onset of the disease (Hata et al., 2003).

214

### 215 *Brain anomalies and dysfunctions*

216 Metanalyses of structural neuroimaging studies in the SZ brain are indicative of a significant  
217 reduction of total brain volume, which mostly affects to the hippocampus, the thalamus and the  
218 cortex, most pronounced in the frontal and temporal lobes (Steen et al., 2006, Haijma et al.,  
219 2013, Haukvik et al., 2013). This is seemingly due to the impairment of the surface expansion  
220 of the cortex during brain growth, which impacts more on the left hemisphere and results in a  
221 relative areal contraction of diverse functional networks (Palaniyappan et al., 2011). Gray  
222 matter reduction in SZ is also associated with longer duration of illness and reduced sensitivity  
223 to antipsychotic medications. Accordingly, brain volume constraints in SZ are better explained  
224 as a combination of early neurodevelopmental disturbance and disease progression (Haijma et  
225 al., 2013). Metanalyses of longitudinal neuroimaging studies of the schizophrenic brain further  
226 suggest that SZ entails a disorder-specific trajectory of morphological change (compared to  
227 other similar conditions like bipolar disorder), which is characterised by a progressive grey  
228 matter loss confined to fronto-temporal cortical regions (De Peri et al., 2012, Liberg et al.,  
229 2016). Children with childhood onset SZ reveals that SZ is characterised by reduced cerebral  
230 volume and cortical thickness during childhood and adolescence, which is levelled off in  
231 adulthood, as well as by deficits in local connectivity and increased long-range connectivity  
232 (Baribeau and Anagnostou, 2013).

233  
234 The reduction of brain volume is expected to impact cognitive and language abilities of patients  
235 and to account for distinctive symptoms of the disease (see also section 5). Specifically,  
236 schizophrenic patients with FTD show clusters of volume reduction in the medial frontal and  
237 orbitofrontal cortex bilaterally (related to poverty of content of speech), and in two left-sided  
238 areas approximating to Broca's and Wernicke's areas (related to the fluent disorganization  
239 component of FTD) (Sans-Sansa et al., 2013). Likewise, reduced brain activity in the left pars  
240 triangularis of Broca's area positively correlates with volume reduction of this area (Iwashiro  
241 et al., 2016). Interestingly, antipsychotic-naïve patients show more pronounced volume  
242 reductions in caudate nucleus and thalamus (Haijma et al., 2013), which play a key role in  
243 language processing (Murphy, 2015). Finally, we wish highlight that amygdala volume is  
244 usually reduced in schizophrenics (Li et al., 2015, Okada et al., 2016, Rich et al., 2016).

#### 245 *Behavioural traits and neuroendocrine impairment*

247 Aggressive behaviour, being involved in the behavioural traits of the “domestication  
248 syndrome”, is frequent in SZ, and paranoid belief may associate with it (Darrell-Berry et al.,  
249 2016). Interestingly, no positive correlation seems to exist between physical aggression and  
250 neuropsychological performance in patients (unless they have attained severe impairment that  
251 induces constant uncontrollable outbursts) (Lapierre et al., 1995).

252  
253 SZ involves as well an impairment of social cognition. Oxytocin is a neuropeptide hormone  
254 that, within a wide range of organic functions, is able to affect social interactions and response  
255 to social stimuli at various levels (reviewed by Romano et al., 2016). Specifically, it has been  
256 recently argued to modulate the multimodality that characterizes our higher-order linguistic  
257 abilities (Theofanopoulou, 2016). Oxytocin promotes social play in domestic dogs and the  
258 appropriate use of human social cues (Oliva et al., 2015, Romero et al., 2015). A positive  
259 correlation between the SZ progression and oxytocin levels in the central nervous system has  
260 been observed (Beckmann et al., 1985), which is plausibly explained by a decreased sensitivity  
261 to the hormone (Strauss et al., 2015, Glovinsky et al., 1994, Sasayama et al., 2012). Treatment  
262 with oxytocin indeed improves verbal memory learning tasks in SZ patients (Feifel et al.,  
263 2012), and attenuates the negative symptoms of the disease (Feifel et al., 2010, Modabbernia  
264 et al., 2013, Gibson et al., 2014, Davis et al., 2014).

265

266 The hypothalamus-pituitary axis (HPA) is also affected in SZ, with both hyper- and hypo-  
267 function being described (Bradley and Dinan, 2010). Accordingly, heightened cortisol levels  
268 are observed in patients with SZ, especially in those who are not medicated (Walker et al.,  
269 2008). At the same time, Hempel et al., (2010) found that cortisol concentration in the plasma  
270 decreases more markedly during the day in SZ patients than in healthy controls, and that the  
271 decrease of HPA axis sensitivity correlates with the severity of negative symptoms. In male  
272 patients, diagnosed with first-episode SZ, higher afternoon cortisol levels at the beginning of  
273 medical treatment are related to impaired memory performance (Havelka et al., 2016). Girshkin  
274 et al., (2016) found that SZ patients do not show significant differences in waking cortisol  
275 levels, in the cortisol awakening response, or in immediate post-cortisol awakening control  
276 decline compared to controls. However, they also found that they exhibit a significant absence  
277 of the increase in cortisol responsivity to stress. According to Ciufolini et al., (2014), SZ is  
278 characterised by an attenuated HPA axis response to social stress: despite a normal cortisol  
279 production rate, schizophrenics have lower cortisol levels than controls, both in anticipation  
280 and after exposure to social stress. In the TD population, HPA activity increases around  
281 puberty, with a postpubertal rise in baseline cortisol secretion linked with pubertal stage  
282 (Walker et al., 2001, Gunnar et al., 2009). It has been suggested that delayed adrenarache  
283 correlates with a higher risk for SZ (Saugstad 1989a, 1989b).

284

#### 285 *Other features*

286 With regard to neoteny, it is noteworthy that SZ patients exhibit lower weight and reduced head  
287 circumference at birth (Cannon et al., 2002), along with slower growth rates and smaller sizes  
288 in childhood (Gunnell et al., 2003, Haukka et al., 2008).

289

290 Reproductive cycles are also affected in both male and female SZ patients. Delayed age at  
291 puberty is associated with greater severity of negative SZ prodromal symptoms in males  
292 (Ramanathan et al., 2015). In women higher negative symptom scores and greater functional  
293 impairment correlate with later age of menarche (Hochman and Levine 2004). Nearly 50% of  
294 women with SZ have irregular menses that are frequently associated to low levels of oestradiol,  
295 although no differences in their neuropsychological status have been found compared to  
296 patients with regular menses (Gleeson et al., 2016). There is ample evidence of the protective  
297 effect of estradiol with respect to SZ, because it interacts with the neurotransmitter systems  
298 implicated in the disease, and because it enhances cognition and memory, and reverses the  
299 symptoms (Gogos et al., 2015). Men with SZ have, indeed, lower levels of testosterone than  
300 healthy controls, and an inverse correlation between serum testosterone and negative symptoms  
301 of the disease has been described (Ramsey et al., 2013, Sisek-Šprem et al., 2015). However, in  
302 more aggressive patients this correlation is not found (Sisek-Šprem et al., 2015). Interestingly,  
303 circulating testosterone levels in schizophrenic males predict performance on verbal memory,  
304 processing speed, and working memory (Moore et al., 2013). Men with SZ show a less  
305 pronounced activation of the middle frontal gyrus when inhibiting response to negative stimuli,  
306 and this response is inversely related to testosterone level, contrary to what is observed in  
307 healthy subjects (Vercammen et al., 2013). Testosterone significantly affects brain  
308 development, particularly targeting the hypothalamus, the amygdala, and the hippocampus, and  
309 impacting on aspects of memory consolidation (Filová et al., 2013).

310

311 Lastly, concerning changes in pigmentation, an association between SZ and albinism has been  
312 occasionally reported (Clarke and Buckley, 1989). In turn, hyperpigmentation is typically  
313 described as a side effect of neuroleptic drugs (specifically, of phenothiazines) used in SZ  
314 treatment (Otreba et al., 2015). Interestingly, low serum vitamin D levels have been found in  
315 SZ patients and they correlate with the severity of psychotic symptoms (Yüksel et al., 2014).



316 The molecular background for this link may rely on shared features of latitude-adaptation  
317 observed in both SZ- and vitamin D-related genes, which suggest that SZ etiopathogenesis may  
318 encounter latitude dependent adaptive changes in vitamin D metabolism (Amato et al., 2010).

319  
320 As noted in section 1, the constellation of symptoms that characterize the “domestication  
321 syndrome” have been hypothesised to result as the unselected by-product of a reduce input in  
322 NC cells (Wilkins et al., 2014). The phenotypical presentation of human neurocristopathies  
323 commonly includes features that have been described in domesticated mammals (Sánchez-  
324 Villagra et al., 2016). Interestingly, well-defined neurocristopathies like velocardiofacial  
325 syndrome (OMIM#192430) and Di George syndrome (OMIM#188400), involve schizophrenic  
326 features (Mølsted et al., 2010, Zhang et al., 2014, Escot et al., 2016). Likewise, given the NC  
327 derivation of most craniofacial structures, craniofacial abnormalities observed in SZ are  
328 believed to result from disturbances in the neuroectoderm development, hence representing  
329 putative external biomarkers of atypical brain growth (Comptom et al., 2007, Aksoy-Poyraz et  
330 al., 2011), and suggesting an additional connection between SZ and domestication, at the level  
331 of NC functional implication.

332  
333 **3. Genetic signature of domestication/neural crest features in the SZ molecular**  
334 **background.**

335  
336 In order to delve into the molecular background of our hypothesis, we first assessed whether  
337 genes that are involved in SZ etiopathogenesis are represented among candidates for  
338 domestication and NC development and function. To this aim, we gathered an extended an up-  
339 to-date list of SZ-associated genes, through literature mining and database search (using the  
340 Schizophrenia Database, <http://www.szdb.org/>). The list includes 2689 genes with different  
341 levels of evidence: genes bearing pathogenic SNPs, genes found mutated in familial forms of  
342 the disease, genes resulting from candidate gene approaches and functional studies, genes  
343 resulting from GWA and CNV/exome sequencing studies, and genes showing alternative  
344 methylation patterns (see the entire list and corresponding details in Supplemental file 1).  
345 Regarding candidates for domestication, we have implemented an enlarged list of candidates,  
346 which includes the core set of genes proposed by Wilkins and colleagues (2014), along with  
347 additional candidates derived from genetic studies performed in different species. The entire  
348 list of domestication candidates comprises 127 genes, detailed in Supplemental file 2. Finally,  
349 the third gene list considered in the analysis includes genes related to NC development and  
350 function. This list comprises 89 genes (see Supplemental file 3) gathered using functional and  
351 pathogenic criteria: NC markers, neurocristopathy-associated genes annotated in the OMIM  
352 database, genes that are functionally involved in NC induction and specification, genes  
353 involved in NC signalling (within NC-derived structures), and genes involved in cranial NC  
354 differentiation.

355  
356 To search the intersections among the three different sets of genes we have employed a simple  
357 Venn diagram (Figure 2), drawn using the software designed and made available as a webtool,  
358 by the bioinformatics evolutionary genomics group, at the University of Gent (Belgium;  
359 webpage: [bioinformatics.psb.ugent.be/webtools/Venn/](http://bioinformatics.psb.ugent.be/webtools/Venn/)). A Venn diagram shows all possible  
360 logical relations between a finite collection of different sets; the diagram consists of multiple  
361 overlapping circles, each representing a set.

362

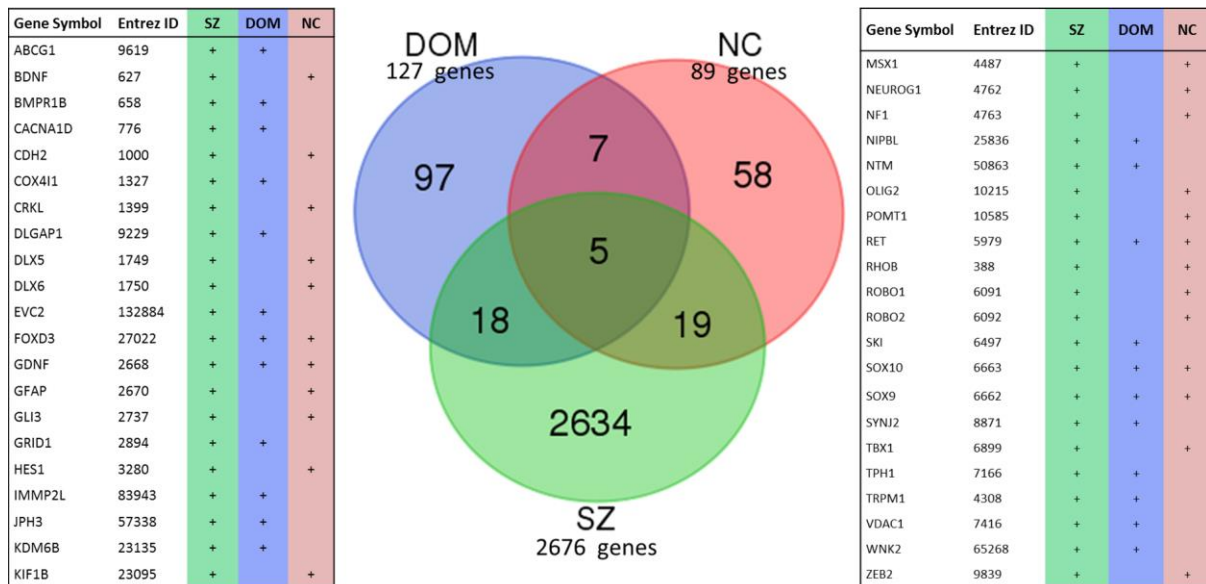

363  
364 **Figure 2. Genetic overlap among schizophrenia, domestication, and neural crest signatures.** Venn  
365 diagrams show the intersection among the extended list of genes considered as either genomic or  
366 functional candidates for schizophrenia (SZ, see Supplemental file 1), domestication (DOM, see  
367 Supplemental file 2) and neural crest (NC, see Supplemental file 3). See text for details.  
368

369 As shown in Figure 2, an overall number of 42 genes were found among the intersection sets  
370 of the diagram. In particular, 5 genes (*FOXD3*, *RET*, *SOX9*, *SOX10* and *GDNF*) were  
371 overlapping within the three gene lists, hence could represent a selected core of candidates that  
372 support our hypothesis. In addition, 18 genes were shared between the SZ list and the  
373 domestication list, while 19 genes were shared between SZ and NC candidates. Overall, we  
374 found out that over 18% (23 out of 127) of domestication candidates, and 27% (24 out of 89)  
375 of genes involved in NC development and function, are listed within those that have been  
376 documented as playing a role, as either putative candidates for, or functionally related to SZ.  
377 Considering domestication (n: 127) and neural crest (n: 89) candidates altogether, this list  
378 comprises 19.4% (42 of 216) SZ candidates.  
379

380 Below we provide with a brief functional characterization and biological interpretation of these  
381 genes.  
382

#### 383 **4. Functional implication and biological interpretation of domestication/NC genes in the** 384 **SZ brain.** 385

386 We expected that the 42 genes we highlight here as part of the shared signature of domestication  
387 and/or NC and SZ (see Figure 2) are functionally interconnected and map on to specific  
388 signaling cascades, regulatory pathways, or aspects of brain development and function, of  
389 interest for SZ etiopathogenesis, and specifically, for language deficits in this condition.  
390 Accordingly, we have employed the license free software for gene network analysis String 10  
391 ([www.string-db.org](http://www.string-db.org)). This allowed predicting quite robust links among the genes. In particular,  
392 the core genes (*FOXD3*, *GDNF*, *RET*, *SOX9*, and *SOX10*) are all reciprocally interconnected,  
393 hence displayed in the central part of the network (Figure 3). These genes are indeed involved  
394 in different steps of NC development and neural specification.  
395

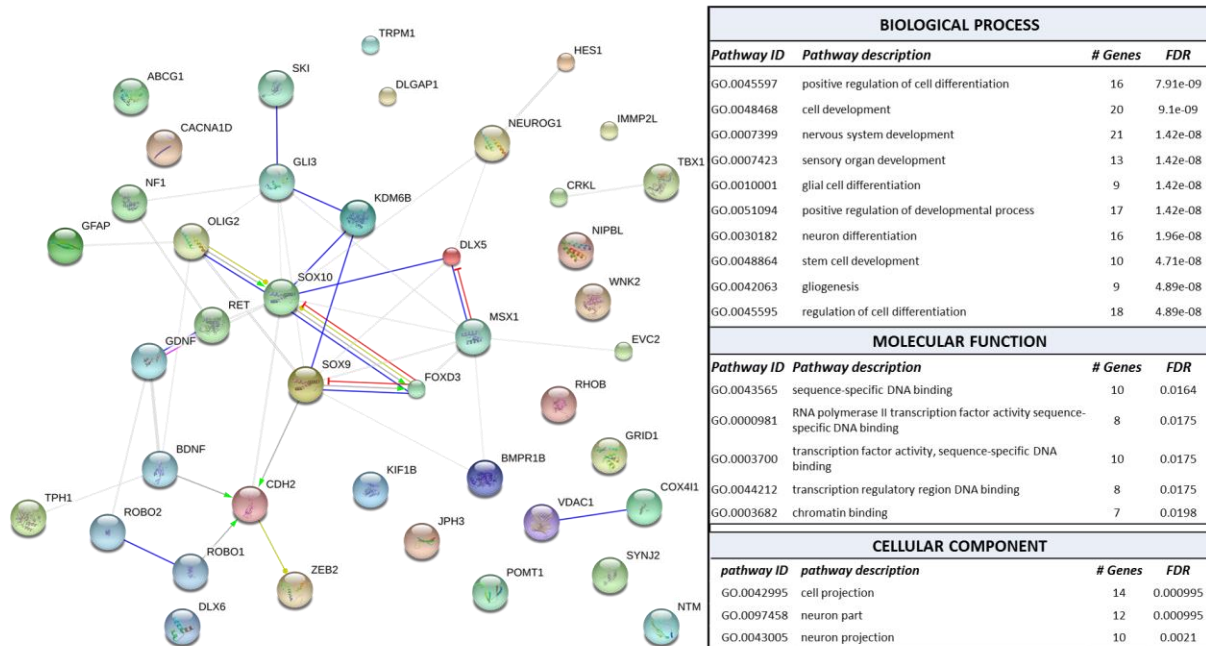

396  
 397 **Figure 3. Gene interaction network.** The diagram shows the network of known and predicted  
 398 interactions among genes proposed as candidates for SZ and domestication and/or NC development and  
 399 function (genes with positive tags in the last two right-sided columns in Figure 2). The network was  
 400 drawn with String (version 10.0; Szklarczyk et al., 2015)) license-free software (<http://string-db.org/>),  
 401 using the molecular action visualization. Colored nodes symbolize gene/proteins included in the query  
 402 (small nodes are for proteins with unknown 3D structure, while large nodes are for those with known  
 403 structures). The color of the edges represent different kind of known protein-protein associations.  
 404 Green: activation, red: inhibition, dark blue: binding, light blue: phenotype, dark purple: catalysis, light  
 405 purple: post-translational modification, black: reaction, yellow: transcriptional regulation. Edges ending  
 406 in an arrow symbolize positive effects, edges ending in a bar symbolize negative effects, whereas edges  
 407 ending in a circle symbolize unspecified effects. Grey edges symbolize predicted links based on  
 408 literature search (co-mentioned in PubMed abstracts). Stronger associations between proteins are  
 409 represented by thicker lines. The medium confidence value was .0400 (a 40% probability that a  
 410 predicted link exists between two enzymes in the same metabolic map in the KEGG database:  
 411 <http://www.genome.jp/kegg/pathway.html>). The diagram only represents the potential connectivity  
 412 between the involved proteins, which has to be mapped onto particular biochemical networks, signaling  
 413 pathways, cellular properties, aspects of neuronal function, or cell-types of interest. Functional  
 414 enrichment of the entire gene set, according to Gene Ontology (GO) consortium annotations, was  
 415 performed using String algorithm for gene network analysis; the output is provided in the table on the  
 416 right. FDR: false-discovery rate, obtained after Bonferroni correction. A FDR cutoff of 0.05 was set to  
 417 select significant functions. For the “biological process” and “molecular function” annotations, only the  
 418 top ten scoring categories are displayed.

419  
 420 *RET* gene is a core domestication candidate (Wilkins et al., 2014), which encodes a tyrosine-  
 421 protein kinase involved in NC development, and is found deleted in SZ patients (Glessner et  
 422 al., 2010). *SOX* genes encode master transcriptional regulators of cell-fate programming during  
 423 development. In particular, *SOX9* and *SOX10* are members of the soxE group, involved in NC  
 424 development and differentiation (Cheung and Briscoe, 2003). *SOX9* acts specifically in  
 425 craniofacial development, downstream of WNT and BMP pathways (Liu et al., 2013b), and  
 426 has been found reproducibly upregulated in SZ brains (Shao and Vawter, 2008, Chen et al.,  
 427 2013, Lanz et al., 2014). *SOX10* regulates NC stem cells balance during development; it is  
 428 functionally related to the SZ-susceptibility gene *DISC1* during early NC cell migration  
 429 (Drerup et al., 2009), and oligodendrocyte differentiation (Hattori et al., 2014). *SOX10* is found  
 430 hypermethylated in the brain of SZ patients (Iwamoto et al., 2005) and carries SNPs that have

431 been related to the age of onset of clinical manifestations (Yuan et al., 2013). *RET* and *SOX10*  
432 are co-expressed as reliable markers in enteric nervous system, although their functional  
433 interaction is not clear (Hetz et al., 2014). In turn, *FOXD3* is required during NC development  
434 and regulates dorsal mesoderm development in the zebrafish (Chang and Kessler, 2010). The  
435 gene locus maps within one of the AMH-specific differentially-methylated genomic regions  
436 (Gokhman et al., 2014), suggesting that changes in the gene functional status may have  
437 occurred during recent human evolution. *FOXD3* is also a transcriptional target of the SZ-  
438 candidate *DISC1*, and is involved in cranial NC migration and differentiation (Drerup et al.,  
439 2009). *SOX9* and *SOX10* indirectly interact through *FOXD3*, as shown in Figure 3, being  
440 coexpressed at different stages of NC development. In particular, *SOX9* seems to drive the  
441 expression of both *SOX10* and *FOXD3* (Cheung and Briscoe, 2003). Finally, *GDNF* is also a  
442 core candidate for the domesticated phenotype in mammals (Wilkins et al., 2014). It encodes a  
443 neurospecific factor involved in the differentiation of dopaminergic neurons and in  
444 synaptogenesis (Christophersen et al., 2007, Ledda et al., 2007). GDNF levels are lower in SZ  
445 patients compared with healthy controls (Tunca et al., 2015). With regard to gene networking,  
446 GDNF contributes to the activation of RET protein-tyrosine kinase (Jing et al., 1996),  
447 mediating neuronal survival (Coulpier et al., 2002).

448  
449 Other genes in the network are directly or indirectly related to the core genes described above.  
450 In particular, *MSX1* and *DLX5* homeotic genes also appear to play pivotal roles in this gene  
451 network, as they establish functional interactions with many of the candidates shown in Figure  
452 3. Interestingly, *MSX* genes control the spatial organization of the NC-derived craniofacial  
453 skeleton (Attanasio et al., 2013, Khadka et al., 2006, Han et al., 2007, Gitton et al., 2011). Also  
454 *DLX* homeobox genes function in early NC development, and also in late specification of NC-  
455 derived structures (McLarren et al., 2003, Ruest et al., 2003), and play key roles as well in skull  
456 and brain development (Jones and Rubinstein, 2004, Kraus and Lufkin, 2006, Vincentz et al.,  
457 2016). In particular, *MSX1* encodes a transcriptional repressor specifically involved in  
458 odontogenesis (Alappat et al., 2003, Cohen, 2000), hence mutated in orofacial clefting and  
459 tooth agenesis (Liang et al., 2016). *MSX1* is a direct downstream target of *DLX5* during early  
460 inner ear development (Sajan et al., 2011). Methylation changes in *MSX1* are found in the  
461 hippocampus of SZ patients, as a part of the circuit-specific DNA methylation changes  
462 affecting the glutamate decarboxylase 1 regulatory network in SZ, which may explain  
463 GABAergic dysfunctions in this condition (Ruzicka et al., 2015).

464  
465 Among the other shared candidates between SZ and domestication, *KDM6B* and *BMPRI1B* are  
466 shown to interact with *SOX9* and *SOX10* (see Figure 3). *KDM6B* encodes a histone  
467 demethylase, which plays a central role in regulation of posterior development. In particular, it  
468 activates neuronal gene expression during postnatal and adult brain neurogenesis in the  
469 subventricular zone (Park et al., 2014). A frameshift mutation, with unknown functional  
470 consequences, has been found in this gene, through whole exome sequencing (WES) of SZ  
471 family trios (Fromer et al., 2014). In turn, *BMPRI1B* encodes a receptor for bone morphogenetic  
472 proteins (BMPs), that are pleiotropic morphogens acting in both bone and neural development.  
473 The interaction with *SOX9* is well characterized during postnatal chondrogenesis (Jing et al.,  
474 2014). Type Ib BMP receptors also mediate the rate of commissural axon extension in the  
475 developing spinal cord (Yamauchi et al., 2013), and, in mice, are involved in supraxial nervous  
476 functions (Caronia et al., 2010). *BMPRI1B* is annotated among the putative SZ epigenetic  
477 signature genes, resulting from genome-wide methylome studies (Aberg et al., 2014).

478  
479 Also *GLI3* is widely functionally involved in this network. This gene encodes a key mediator  
480 of the hedgehog signalling in vertebrates, acting as a repressor in dorsal brain regions (Haddad-

481 Tóvulli et al., 2012). It controls cortical size by regulating the primary cilium-dependent  
482 neuronal migration (Wilson et al., 2012). With regards to SZ, a *de novo* missense mutation in  
483 *GLI3* has been recently identified through WES (Fromer et al., 2014). *GLI3* has been found to  
484 interact, both *in vivo* and *in vitro*, with *SKI* (Ravasi et al., 2010). This gene encodes a  
485 transcription factor that regulates TGF $\beta$  signaling and is mutated in nearly 90% of cases of  
486 Shprintzen-Goldberg syndrome (OMIM#182212), a condition entailing craniofacial and brain  
487 anomalies (Au et al., 2014). This gene is found methylated in SZ patients (Montano et al.,  
488 2016). Indeed, in the brain, *SKI* regulates the proliferation and differentiation of neural  
489 precursors, along with the specification of cortical projections (Lyons et al., 1994, Baranek and  
490 Atanasoski 2012). In the mouse embryo, *Ski* is expressed in the migrating NCCs and in NC  
491 derivatives (Lyons et al., 1994).

492  
493 *OLIG2* encodes a transcription factor that interacts with SOX proteins, and plays a key role in  
494 the regulation of ventral neuroectodermal progenitor cell fate. Specifically, it is essential for  
495 oligodendrocyte function, whose impairment is thought to be a primary pathogenic event in  
496 SZ, specifically affecting the prefrontal cortex (Georgieva et al., 2006, Mauney et al., 2015).  
497 Indeed, in our network *OLIG2* is also linked to *GFAP*, which encodes a hallmark structural  
498 component of mature astrocytes. Interestingly, *GFAP* levels are upregulated in the left posterior  
499 superior temporal gyrus (Wernicke's area) of schizophrenics (Martins de Souza et al., 2009).

500  
501 Another key node in the network is represented by the *CDH2* gene, which encodes a member  
502 of the cadherin superfamily involved in the formation of cartilage and bone, the establishment  
503 of left-right asymmetry, and the development of the nervous system (Kadowaki et al., 2007,  
504 Martínez-Garay et al., 2016)). Inactivation of *CDH2* in the dorsal telencephalon results in a  
505 “double cortex” phenotype, with heterotopic gray matter interposed between zones of white  
506 matter (Gil-Sanz et al., 2014). *CDH2* indeed regulates the proliferation and differentiation of  
507 ventral midbrain dopaminergic progenitors, the organization of excitatory and inhibitory  
508 synaptic circuits, and long-term potentiation in the adult hippocampus (Bozdagi et al., 2010,  
509 Sakane and Miyamoto 2013, Nikitczuk et al., 2014). The gene was found mutated in  
510 schizophrenics in a WES study (Purcell et al., 2016). *CDH2* integrates *SOX9* signaling and  
511 regulates *OLIG2* in neuroepithelial lineage cells, during vertebrate brain development (Sasai et  
512 al., 2014). Also, *CDH2* cooperates with the *BDNF* in the aggregation, assembly and  
513 mobilization of synaptic vesicles (Bury and Sabo, 2014). *BDNF* encodes a nerve growth factor  
514 needed for neuronal survival and synaptic plasticity. Common variants/polymorphisms of the  
515 gene have been associated with specific cognitive processes (see Goldberg and Weinberger  
516 2004, González-Giraldo et al., 2014, Jasińska et al., 2016, Wegman et al., 2016) and with the  
517 cognitive performance of people suffering from neuropsychiatric conditions. In particular,  
518 abnormally low levels of *BDNF* have been detected in schizophrenics (Palomino et al., 2006).  
519 Functional genomics has indeed identified *BDNF* among a list of reliable SZ candidates,  
520 contributing to the genetic background for the neurodevelopmental abnormalities leading to  
521 the disrupted connectivity occurring in the disease (Ayalew et al., 2012). Being implicated in  
522 axonogenesis and neural cell polarization, *CDH2* is also indirectly related to *ROBO* genes.  
523 *ROBO1* and *ROBO2* encode highly conserved transmembrane receptors that function in axon  
524 guidance and neuronal precursor cell migration. Mutations in *ROBO* genes have been linked  
525 to human neurodevelopmental disorders, as discussed in the next section. Noticeably,  
526 functional genomics analyses have identified both *ROBO1* and *ROBO2* as candidate loci for  
527 SZ risk (Potkin et al., 2009, 2010). Finally, *ZEB2* appears as an additional functional partner  
528 of *CDH2* in the network (Figure 3). This gene encodes a transcriptional factor, which acts as  
529 an essential regulator of neuroectoderm and NC development, contributing to the development  
530 of the neocortex and the hippocampus (Hegarty et al., 2015). Besides being mutated in the

531 Mowat-Wilson syndrome (OMIM#235730), a condition characterized by Hirschsprung  
532 disease, craniofacial dysmorphisms, and intellectual disability (Adam et al., 2006, Garavelli et  
533 al., 2016), *ZEB2* maps within a SZ-associated locus, thus possibly representing a player in the  
534 polygenic etiology of this condition (Ripke et al., 2013, Bigdeli et al., 2016).

535

536 Other candidate genes are not clearly functionally interconnected in the core interacting  
537 network (see Figure 3), although most of them play relevant roles in cognitive functions that  
538 have evolved in humans. Most of them are further discussed in section 5 because of their impact  
539 on language development.

540

541 The functional enrichment, based on gene ontology (GO) annotations, of the gene list  
542 considered in this study (Figure 2), point out that most of these genes act in signaling pathways  
543 known to be impaired in SZ and might play biological functions that are affected in this  
544 condition (see GO annotation table in Figure 3). Noticeably, the top-scoring functional  
545 categories, resulting from the functional annotations, include regulation of nervous system  
546 development and of cell differentiation, specifically of glial cells and neurons. Among the  
547 molecular function GO categories, transcription regulation hits as the most relevant; indeed,  
548 many of the genes listed here encode transcription factors and epigenetic modulators, that on  
549 their turn modulate the expression of genes with pleiotropic role in brain development,  
550 cognitive abilities (including language processing). Finally, considering the cellular  
551 localization of the proteins, most of them appear to localize inside the cell projection  
552 components, confirming their role as regulators of neuron interconnection.

553

554 We have further attempted to delve into the actual functional implication of these selected  
555 genes in the SZ molecular pathogenesis, by assessing whether their expression is significantly  
556 modulated in the SZ brain. To this aim, we surveyed the Gene Expression Omnibus (GEO)  
557 repository (<https://www.ncbi.nlm.nih.gov/gds>) searching for gene expression datasets obtained  
558 from SZ brain profiling. The following dataset were selected and corresponding data were  
559 gathered: GSE53987 (prefrontal cortex, hippocampus, and associative striatum; Lanz et al,  
560 2014), GSE4036 (cerebellum; Perrone-Bizzozzero, unpublished data), GSE21935 (temporal  
561 cortex; Barnes et al, 2011); GSE35977 (parietal cortex; Chen et al, 2013); GSE62191 (frontal  
562 cortex; de Baumont et al, 2015). The specified datasets were selected based on their  
563 homogeneous and comparable study design. Additional details are provided in Table 1.  
564 Specifically, all datasets were obtained by means of genome-wide microarray expression  
565 profiling of dissected cadaveric brain tissues from SZ patients and matched controls. Raw  
566 datasets were individually analyzed *in silico* as previously described (Benítez-Burraco et al.,  
567 2016). Briefly, the GEO2R tool (<http://www.ncbi.nlm.nih.gov/geo/geo2r/>; Barrett et al., 2013)  
568 was used to compare patients-versus-controls normalized probeset intensities provided by the  
569 submitters. The p-value was adjusted, whenever appropriate, using Bonferroni-Hochberg  
570 correction for false discovery rate (FDR). A p-value cutoff <0.05 was set for filtering data.  
571 Base 2 logarithm transformation of fold changes (logFC) were applied to obtain relative  
572 expression changes between SZ patients and corresponding controls.

573

574 **Table 1. Dataset description**

575

| GEO accession | Tissue type (brain region)    | Experimental groups/Disease status | n*       | Array Type/Platform                            | Reference                          |
|---------------|-------------------------------|------------------------------------|----------|------------------------------------------------|------------------------------------|
| GSE4036       | Cerebellum (crus I/VIIa area) | SZ<br>CONTROL                      | 14<br>14 | Affymetrix Human Genome<br>U133 Plus 2.0 Array | Perrone-Bizzozzero,<br>unpublished |

|          |                                                          |                                                 |                                  |                                                                |                         |
|----------|----------------------------------------------------------|-------------------------------------------------|----------------------------------|----------------------------------------------------------------|-------------------------|
| GSE21935 | Superior temporal cortex (Brodmann Area 22)              | SZ<br>CONTROL                                   | 23<br>19                         | Affymetrix Human Genome U133 Plus 2.0 Array                    | Barnes et al., 2011     |
| GSE62191 | Frontal cortex                                           | SZ<br>CONTROL                                   | 29<br>30                         | Agilent-014850 Whole Human Genome Microarray 4x44K G4112F      | De Baumont et al., 2015 |
| GSE53987 | Associative striatum<br>Prefrontal cortex<br>Hippocampus | SZ<br>CONTROL<br>SZ<br>CONTROL<br>SZ<br>CONTROL | 18<br>18<br>19<br>19<br>15<br>18 | Affymetrix Human Genome U133 Plus 2.0 Array                    | Lanz et al., 2014       |
| GSE35977 | Parietal cortex                                          | SZ<br>CONTROL                                   | 4<br>5                           | Affymetrix Human Gene 1.0 ST Array [transcript (gene) version] | Chen et al., 2013       |

576 \* each sample corresponds to a single individual (i.e. biological replicate).

577

578 Through this approach, we have obtained cortical area-specific expression profiles of the SZ  
579 brain. Complete gene lists of differentially expressed genes obtained from each dataset are  
580 provided in Supplemental file 4. Briefly, the cerebellum expression profiles of SZ patients  
581 included in the GSE4036 data series yielded over 1800 annotated genes showing statistically  
582 significant ( $p$ -value $<0.05$ ) differential expression over controls. The data analysis of the  
583 temporal cortex data included in the GSE21935 dataset yielded nearly 1950 annotated genes  
584 ( $p$  $<0.05$ ). In the frontal cortex (GSE62191 dataset), the expression profile included 727  
585 differentially expressed annotated genes ( $p$  $<0.05$ ), whereas in the prefrontal cortex, analyzed  
586 in an independent study (GSE53987 dataset), it included nearly 6200 genes ( $p$  $<0.05$ ). Finally,  
587 the *in silico* analysis of data included in the GSE53987 dataset allowed also obtaining  
588 expression profiles of the associative striatum nucleus (6705 annotated genes,  $p$  $<0.05$ ) and of  
589 the hippocampus (over 4000 genes,  $p$  $<0.05$ ) of SZ patients.

590

591 The extended gene lists of annotated genes obtained from the analysis of each dataset (see  
592 supplemental file 4) were then used for searching the selected 42 candidates specified in the  
593 previous section. Overall, we found significant differential expression values for over 75% (32  
594 out of 42) of the common candidates for SZ, domestication, and/or NC development and  
595 function, as discussed above, namely: *BDNF*, *BMPRI1B*, *CACNA1D*, *CDH2*, *COX4I1*,  
596 *DLGAP1*, *DLX5*, *DLX6*, *FOXD3*, *GDNF*, *GLI3*, *GRID1*, *HES1*, *IMMP2L*, *JPH3*, *KDM6B*,  
597 *KIF1B*, *MSX1*, *NF1*, *NIPBL*, *OLIG2*, *POMT1*, *RET*, *ROBO2*, *SKI*, *SOX9*, *SYNJ2*, *TBX1*, *TPH1*,  
598 *VDAC1*, *WNK2* and *ZEB2*. These genes resulted differentially expressed in different brain areas  
599 (Figure 4a), the largest number being found within the expression profiles of the frontal cortex  
600 (21 genes), the associative striatum nucleus (16 genes), and the hippocampus (11 genes). These  
601 functional events are obviously observed in adult (cadaveric) specimens, hence they could not  
602 reflect the molecular events that have occurred during early neural development, which are  
603 crucial for the etiopathogenesis of SZ. Nonetheless, some insights into the molecular  
604 networking that underlie the impaired cognitive and social scenarios acting in the SZ brain  
605 could be gathered. Moreover, it is important to note that all these brain areas exhibit anomalies  
606 (structural and functional) in schizophrenics, play a role in language processing, and show  
607 differences in domesticated animals compared to their wild conspecifics.

608

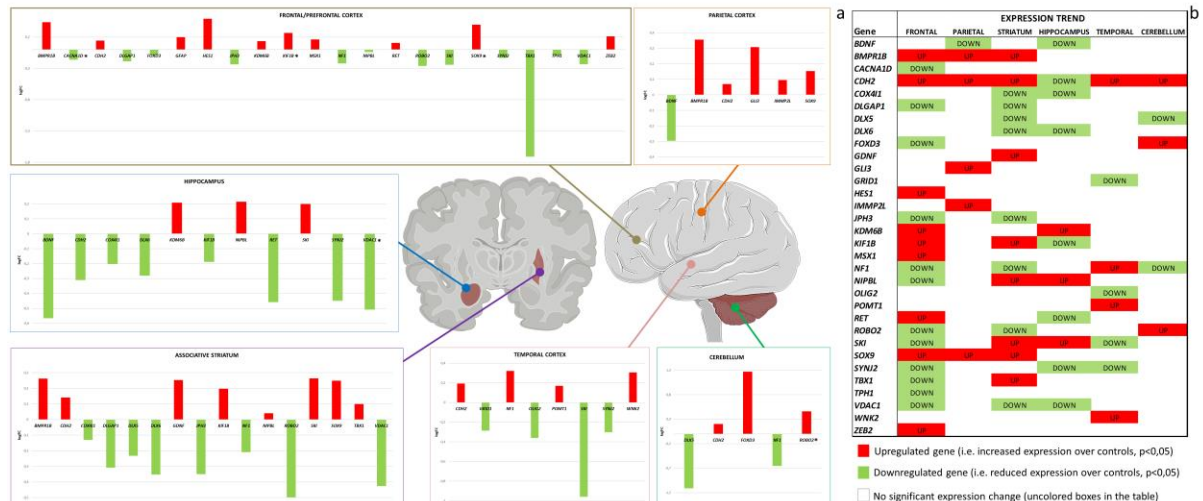

609  
 610 **Figure 4. Brain gene expression profiles in SZ patients.** The figure on the left (a) illustrates the  
 611 differential expression of the candidate genes found overlapping between SZ and domestication and/or  
 612 NC development and function in the tested brain areas. The background diagrams show a coronal  
 613 section across the midline (on the left) and a lateral view (on the right) of the brain. The pictures were  
 614 gathered and modified from “Slide kit Servier Medical Art” (available at [www.servier.com](http://www.servier.com)). In each  
 615 bar graph: the Y-axis shows the log fold change (logFC) values calculated between SZ patients and  
 616 controls in each tested dataset (red bar: upregulated gene, green bar: downregulated gene; see text for  
 617 details). The logFC value of genes labeled with an asterisk was calculated as the mean value of  
 618 duplicated probeset raw data found in the corresponding dataset (see Supplemental file 4 for extended  
 619 gene lists). FC values cannot be directly compared when obtained from different datasets (refer to Table  
 620 1), as they represent relative expression quantities, normalized over different controls samples in  
 621 different studies. The expression trends of each gene across the different areas is shown as a cluster  
 622 view in the image on the right (b).

623  
 624 In the frontal cortex, most of the core-set genes in the gene network displayed in Figure 3 are  
 625 upregulated, namely *BMPRI1B*, *CDH2*, *KDM6B*, *MSX1*, *RET*, *SOX9* and *ZEB2*. A pivotal role  
 626 in this selected group is played by *SOX9*, whose activation occurs downstream to BMP  
 627 signaling (Liu et al., 2013b), consistent with the coherent upregulation *BMPRI1B*. *KDM6B*  
 628 binds and cooperates with *SOX9*. *SOX9* promotes *CDH2* activation (Sasai et al., 2014), which,  
 629 in turn, induces the SMAD cascade and leads to *ZEB2* transcriptional activation (Bedi et al.,  
 630 2014). In the same brain area, *FOXD3* (a *SOX9* repressor, based on String10 prediction) is  
 631 downregulated, along with other 11 candidates (Figure 4a). Interestingly, genes that displayed  
 632 differentially expression in the frontal cortex of domestic animals (dogs, pigs, rabbits, and  
 633 guinea pigs) compared to their wild counterparts included a widely conserved *SOX* gene  
 634 (Albert et al, 2012), strongly supporting the central role of these gene family in the brain  
 635 changes implicated in the domestication process.

636  
 637 In the temporal cortex, *OLIG2* and *SKI*, among others, show a reduced expression trend (Figure  
 638 4a), possibly indicative of the impaired glial function. Indeed, *SKI* methylation was described  
 639 in SZ brains (Montano et al., 2016).

640  
 641 It is worth noting that structural and functional anomalies in the frontal and temporal cortices  
 642 of SZ patients are believed to impact greatly on their language abilities. Accordingly, lexical  
 643 processing in SZ entails abnormal oscillatory patterns in the left frontal-temporal areas,  
 644 specifically reduced temporal lobe  $\alpha$  and left frontal lobe  $\beta$  activity (Xu et al., 2013, Sun et al.,  
 645 2014). Likewise, complex sentences understanding involves reduced activation in the right  
 646 posterior temporal and left superior frontal cortex in schizophrenic patients (Kircher et al.,



647 2005). Reduced  $\alpha$  and  $\beta$  in left temporal-parietal sites, along with reduced  $\theta$  at right frontal lobe  
648 sites is observed during phrase structure chunking (Ferrarelli et al., 2012, Xu et al., 2012).  
649 Interestingly too, the ratio fronto-parietal vs. fronto-temporal connectivity has increased from  
650 monkeys to apes to modern humans (Hecht et al., 2013), providing the evolutionary scaffolding  
651 for our imitation abilities, which underlie cultural innovation (see Boeckx and Benítez-Burraco  
652 2014a for discussion).

653  
654 Also in the striatum, key candidates, including *BMPR1B*, *CDH2*, *SOX9*, *GDNF* and *SKI* are  
655 coherently upregulated, while *DLX* genes and *ROBO2* are downregulated, suggesting that key  
656 molecular markers of NC-derived structures are impaired in this nucleus. The striatum is,  
657 indeed, part of the cortical-subcortical loop involved in learning speech sequences for  
658 articulation, and in extracting complex regularities in auditory sequences (Krishnan et al.,  
659 2016).

660  
661 With regards to the hippocampus, we have found that eight candidates are downregulated,  
662 including *BDNF*, *CDH2*, *DLX6*, and *RET* (Figure 4a). Based on the reciprocal functional  
663 connections among these genes, discussed above, their shared expression trends may reflect an  
664 altered hippocampal synaptic function. Also *VDAC1* and *COX4II* are downregulated in this  
665 brain region (Figure 4a); these genes are both expressed in the mitochondrion and are involved  
666 in energy production and ion homeostasis (Richter et al., 2010, Shoshan-Barmatz et al., 2015).  
667 Hence, their downregulation reasonably impacts on brain bioenergetics, in SZ and also in other  
668 disorders featuring cognitive impairment (Rosa et al., 2016). Interestingly, *KDM6B*, a target of  
669 activin signaling involved in cognitive function and affective behavior (Link et al., 2016), is  
670 also upregulated in the SZ hippocampus (Figure 4a). The hippocampal expression of *SKI* gene  
671 is increased as well, suggesting aberrant cortical connections in the SZ hippocampus. The  
672 hippocampus is involved in language learning (Krishnan et al., 2016), and displays a reduced  
673 volume in schizophrenics (Hirayasu et al., 1998), which can be related to phrase chunking  
674 difficulties, due to oscillations generated in this region (Murphy, 2015). Interestingly, some  
675 domestic animals exhibit changes in the hippocampus that can be related to differences in their  
676 cognitive and behavioral features (Rehkämper et al., 2008).

677  
678 Finally, few candidates show expression changes in the cerebellum; these include *CDH2*,  
679 *FOXD3* and *ROBO2*, coherently upregulated (Figure 4a), confirming their synergic functions,  
680 as gathered from the network analysis (see Figure 3). The cerebellum is involved in both motor  
681 and non-motor language-related processes, (Mariën et al., 2014, Noroozian 2014), with  
682 structural and functional anomalies documented in SZ patients (Keller et al., 2003, Chen et al.,  
683 2013)

684  
685 Taken together, the expression levels of the entire gene set across the tested brain areas suggest  
686 that a hallmark of the SZ brain molecular signature is the abnormal activation of the BMP-  
687 SOX9-CDH2 axis, given the reproducible upregulation of *BMPR1B*, *CDH2*, *KDM6B*, *SOX9*  
688 (in at least two areas; Figure 4b). Conversely, our data show a prevalent repression of *BDNF*,  
689 *DLX5-6*, *JPH3*, *COX4II*, *DLGAP1*, *NF1*, *SYNJ2* and *VDAC1* in the SZ brain, suggesting the  
690 overall impairment of molecular mechanisms affecting neuronal survival, synaptic plasticity  
691 and functional, and social cognition (Li et al., 2016, Petrella et al., 2016). We reasonably expect  
692 that these changes account in part for the specific cognitive, language, and social phenotype of  
693 schizophrenics.

694  
695 Regarding the biological consequences of this overlapping between domestication and/or NC  
696 candidates, and SZ candidates, we wish to add two notes of caution. First, we have found that

697 between 20-30% of candidates for domestication/NC are also related to SZ, whereas roughly  
698 5% of the coding genes of the human genome have been implicated in the disease (according  
699 to the Schizophrenia Database). Nonetheless, because of pleiotropy, it may well be that some  
700 of these common candidates are not playing the same biological function domestication/NC  
701 and in SZ. This possibility has to be confirmed experimentally for each candidate. That said,  
702 we have shown that some promising functional overlapping can be found. SZ is a late-  
703 developing condition, because important brain changes resulting in the disease (e.g. changes in  
704 neural pruning mechanisms) occur during adolescence, whereas domestication mostly results  
705 from changes in early developmental stages. Nonetheless, available evidence also suggests that  
706 the brain and the cognition of SZ patients develop differentially (compared with typically-  
707 developing people) since the very beginning, as shown by studies in presymptomatic patients  
708 (Cannon et al., 2015; Liu et al., 2015; Filatova et al., 2017; Sugranyes et al., 2017). At the same  
709 time, developmental changes, brought about by the early disturbance of the NC function (and  
710 by domestication in general), are expected to have an impact throughout lifespan, particularly,  
711 because of its effect on the environment. Accordingly, it is reasonable to claim the existence  
712 of a biological overlapping between the etiology of SZ, the role of NC in development, and  
713 domestication of the human phenotype.

714

## 715 **5. Schizophrenia and (the evolution of) human language**

716

717 Many of the genes gathered in our selected gene list play a role in the etiopathogenesis of  
718 phenotypes affecting the language domain, reinforcing the link between domestication, SZ,  
719 and language. In most cases, though, the implication in neural/cognitive functions could be  
720 viewed as a side-effect of the wide pleiotropism and extremely heterogeneity of the vast group  
721 of genes considered to lay the polygenic foundation of SZ.

722

723 *DLX* genes, including *DLX5* and *DLX6* are also important for the evolution of language-  
724 readiness, based on their interaction with *FOXP2* and *RUNX2* (Boeckx and Benítez-Burraco,  
725 2014a). *Dlx5/6(+/-)* mice show reduced cognitive flexibility that seemingly results from an  
726 abnormal pattern of  $\gamma$  rhythms, caused by abnormalities in GABAergic interneurons: this  
727 phenotype recapitulates some clinical findings of SZ patients (Cho et al., 2015). During  
728 language processing  $\gamma$  rhythms are hypothesised to generate syntactic objects before  $\beta$  holds  
729 them in memory and they also contributes to lexical processing (see Murphy 2015 for details).  
730 As noted in the previous section, in schizophrenics reduced  $\gamma$  activity is observed at frontal  
731 sites during semantic tasks; likewise, higher cross-frequency coupling with occipital  $\alpha$  is  
732 usually detected (Murphy and Benítez-Burraco, 2016a).

733

734 Also *ROBO* genes are core candidates for language evolution (Boeckx and Benítez-Burraco  
735 2014b). *ROBO1* is a candidate for dyslexia and speech-sound disorders (Hannula-Jouppi et al.,  
736 2005, Mascheretti et al., 2014), and is involved in the neural establishment of vocal learning  
737 abilities (Wang et al., 2015). The *ROBO2* locus is also in linkage with dyslexia and speech-  
738 sound disorder and reading (Fisher et al., 2002, Stein et al., 2004), and is associated with  
739 expressive vocabulary growth in the unaffected population (St Pourcain et al., 2014).

740

741 *GLI3* is involved in a craniofacial syndrome involving cognitive impairment, both in humans  
742 (Greig cephalopolysyndactily, OMIM#175700) and in mice (Veistinen et al., 2012; Lattanzi et  
743 al, in press; Tabler et al., 2016) with cognitive impairment, which entails language delay  
744 (McDonald-McGinn et al., 2010, Lattanzi, 2016). Indeed, it regulates skull development acting  
745 on the *DLX5/RUNX2* cascade (Tanimoto et al., 2012), hence it is expected to have played a  
746 role in the physiological events leading to globularization, in which these genes were seemingly

747 involved (Boeckx and Benítez-Burraco, 2014a; Nearly 98% of Altaic Neanderthals and  
748 Denisovans gained a non-synonymous change in *GLI3* that is described as mildly disruptive  
749 (Castellano et al., 2014).

750

751 *OLIG2* confers susceptibility to SZ, alone and as part of a network of genes implicated in  
752 oligodendrocyte function (Georgieva et al., 2006). *OLIG2* is also associated with psychotic  
753 symptoms in Alzheimer's disease (Sims et al., 2009) and is up-regulated in the cerebellum of  
754 ASD patients (Zeidán-Chuliá et al., 2016).

755

756 *SKI* is mutated in Shprintzen-Goldberg syndrome that features skeletal abnormalities and  
757 intellectual disability, including speech and language impairment (Au et al., 2014). Speech  
758 impairment has been hypothesized to result from poorer phonological abilities, although  
759 changes in the quality of the voice (pitch, nasalization) are also observed in patients (Van  
760 Lierde et al., 2007).

761

762 A well-known polymorphism of *BDNF* (Val66Met) seemingly influence in the pattern of brain  
763 activation and task performance during reading, including reading comprehension and  
764 phonological memory (Jasińska et al., 2016). This and other *BDNF* polymorphisms have a  
765 proven to impact on the language performance of SZ patients (Kebir et al., 2009, Zhang et al.,  
766 2016). *BDNF* is also mentioned as one of the genes defining the genetic architecture of human  
767 developmental language impairment (Li and Bartlett 2012).

768

769 In Mowat-Wilson syndrome, due to *ZEB2* mutations, severe impairment of productive  
770 language is described (Adam et al., 2006, Garavelli et al., 2016).

771

772 *NFI* is mutated in neurofibromatosis type 1 (OMIM#162200), a neurogenetic disorder  
773 comprising an increased risk for learning and intellectual disabilities, among other major  
774 symptoms (Anderson and Gutmann 2015). Affected children may exhibit high rates of social  
775 impairment that impact social interaction and skills (Allen et al., 2016; Brei et al., 2014). These  
776 might result, in part, from a generalized deficit in the "Theory of Mind" (crucial for language  
777 acquisition), which seems to be independent of their general cognitive abilities (Payne et al.,  
778 2016). They also feature poor expressive language and preliteracy skills (Lorenzo et al., 2013,  
779 2015). Deficit in fine motor skills usually co-occur, due to the impairment of fronto-striatal-  
780 cerebellar loop (Iannuzzi et al., 2016). Interestingly, heterozygous *Nfi* (+/-) mice show larger  
781 brain volumes in the prefrontal cortex, in the caudate and the putamen (part of the language  
782 structural network), and in regions involved in social recognition and spatial learning (Petrella  
783 et al., 2016). Although these children frequently exhibit ASD symptoms, they outscore IQ-  
784 matched children with ASD in eye contact, behavior, and language skills (Garg et al., 2015).

785

786 Other genes, not clearly interconnected in the network (see Figure 3), are also clearly  
787 implicated in neural functions that are relevant to the language domain.

788

789 *NIPBL* is a candidate for Cornelia de Lange syndrome (OMIM#122470), in which the  
790 intellectual disability greatly impacts on the expressive language abilities (Boyle et al., 2015,  
791 Parisi et al., 2015). The gene is also a putative candidate for childhood apraxia of speech (Peter  
792 et al., 2016).

793

794 *VDAC1* may reasonably represent a marker of neuronal vulnerability and cognitive  
795 impairment, in neurodegenerative conditions including Alzheimer disease (Rosa et al., 2016),  
796 and neuronal ceroid lipofuscinoses (Kielar et al 2009). These conditions are characterized by

797 speech and language problems, with a decline in verbal abilities over time (Lamminranta et al.,  
798 2001, von Tetzchner et al., 2013).

799

800 The region containing *GRID1* has been associated with the parieto-occipital 10-Hz rhythmic  
801 activity (Salmela et al., 2016). This  $\alpha$  rhythm, which synchronizes distant cortical regions, is  
802 involved in lexical decision making and contributes as well to the embedding of  $\gamma$  rhythms  
803 generated cross-cortically in order to yield inter-modular set-formation during language  
804 processing (see Murphy 2015 for details). This rhythmic activity is found altered in SZ during  
805 lexical and sentence processing (Murphy and Benítez-Burraco 2016a).

806

807 *IMMP2L* is a candidate for behavioural disorders, including Gilles de la Tourette syndrome  
808 (OMIM#137580) (Bertelsen et al., 2014, Gimelli et al., 2014). In this condition multiple motor  
809 and vocal tics are described that impact on language processing (Frank 1978).

810

811 Abnormal expansion of repeats in the 3' UTR of *JPH3* have been associated with an allelic  
812 variant of Huntington disease (OMIM#606438), in which developmental impairment,  
813 including neurologic abnormalities and dysarthria, are featured (Seixas et al., 2012, Mariani et  
814 al., 2016). Likewise, mutations in *JPH3* give rise to generalized cerebral atrophy, mostly  
815 impacting on the basal ganglia (a core component of the brain language circuitry), and are  
816 associated with cognitive decline and psychiatric features, including lack of speech due to  
817 akinexia (Walker et al., 2003, Schneider et al., 2012).

818

819 Also *ABCG1* has been associated with conditions entailing cognitive impairment, language  
820 deficits, and neuropsychiatric symptoms (Leoni and Caccia 2015).

821

822 *CACNAID* is associated with several neuropsychiatric conditions (Kabir et al., 2016) and plays  
823 important roles in hippocampus-dependent learning and memory (Marschallinger et al., 2015).  
824 It also contributes to aversive learning and memory processes (Berger and Bartsch 2014, Liu  
825 et al., 2014), and has been linked to neurodegenerative disorders (Berger and Bartsch 2014).  
826 Mutations in this gene are considered among risk factors for ASD and intellectual disability,  
827 both entailing language deficits (Pinggera et al., 2015).

828

829 *HES1* is thought to be important for the evolution of language, because of its specific  
830 interactions with *ROBO1* and *RUNX2* (Boeckx and Benítez-Burraco, 2014b).

831

832 *POMT1* is associated with clinical conditions entailing severe mental retardation (van  
833 Reeuwijk et al 2006, Godfrey et al., 2007, Yang et al., 2016. Mutations in this gene occasionally  
834 result in psychotic symptoms (hallucinatory behavior) (Haberlova et al 2014).

835

836 *TBX1* and *CRKL* map within the chromosomal hotspot for the Di George/velocardiofacial  
837 clinical spectrum, which are neurocristopathies entailing brain anomalies, behavioural  
838 disturbances, cognitive impairment, and language delay (Swillen et al., 1997, Swillen et al.,  
839 1999, Guris et al., 2001, Glaser et al., 2002). *Tbx1* haploinsufficiency in mice causes prepulse  
840 inhibition, a robust endophenotype of nonsyndromic SZ (Paylor et al., 2006), and impacts  
841 negatively on pup-mother social communication (Takahashi et al., 2016).

842

843 Polymorphisms in *NEUROG1* have been associated with SZ and schizoaffective disorder, one  
844 of which being significantly associated with increased cerebral gray matter and generalized  
845 cognitive deficits (Ho et al., 2008).

846

847 *SYNJ2* is an evolutionary conserved gene, and a putative cognitive candidate, whose variants  
848 have been found associated with cognitive ageing in selected populations (López et al., 2012).

849

850 Finally, mutations in *GFAP* give rise to Alexander disease (OMIM#203450). Specifically,  
851 *GFAP* is upregulated in the left posterior superior temporal gyrus (Wernicke's area) of  
852 schizophrenics, a region crucially implicated in language processing (Martins de Souza et al.,  
853 2009).

854

855 The involvement of most of these common candidates for SZ, domestication and NC in  
856 language function provides with an unexpected, intriguing window on language evolution. As  
857 we pointed out in the introductory section, an evolutionary link has been claimed to exist  
858 between the origins of language and the prevalence of SZ among human populations, because  
859 of the nature of the brain changes that brought about language, which plausibly favour the  
860 dysfunctions typically found in SZ. In this paper we have argued for putting the focus not only  
861 on the split between extinct hominins and AMHs, but also on the time period following the  
862 emergence of our species. The main reason is that changes in the social environment linked to  
863 our subsequent self-domestication are expected to have contributed to the emergence of  
864 modern languages. As we have showed in the paper, many candidates for domestication and  
865 NC development and function are involved in language, but also in the etiopathogenesis of SZ,  
866 reinforcing the view that domestication, language evolution, and SZ are intimately related. The  
867 genes we highlight here might have contributed to this set of late, domestication-related  
868 changes in the human phenotype. Interestingly, signals of ancient selection (occurring >1,900  
869 generations ago, prior to the split of present-day human groups) have been found in some of  
870 our candidates, particularly, in *ZEB2*, but also in *BMP2*, a gene encoding another BMP  
871 receptor (Zhou et al., 2015). This is in line with the finding that SZ risk alleles may have mainly  
872 appeared during this late period, after the emergence of our species. We expect that these recent  
873 changes in our candidates contributed as well to the changes that are concomitant to the  
874 domestication process.

875

## 876 **6. Conclusions**

877

878 Taken together, the data discussed in this paper may provide original hints towards the  
879 clarification of some aspect of SZ etiopathogenesis, balancing genetic, epigenetic and  
880 environmental factors, and merging development and evolution. The proposed approach may  
881 help to disentangle as well the evolutionary history of human cognition, and specifically, of the  
882 human faculty of language. In particular, it supports the view that changes in the social context  
883 linked to self-domestication contributed decisively to the emergence of modern language and  
884 present-day complex languages and that both genetic and environmental factors play a role in  
885 this process.

886

## 887 **Acknowledgements**

888

889 Preparation of this work was supported in part by funds from the Spanish Ministry of Economy  
890 and Competitiveness (grant numbers FFI2014-61888-EXP and FFI-2013-43823-P to ABB),  
891 and in part by "Linea D1- 2016 and 17" intramural funds from Università Cattolica S. Cuore  
892 (to WL).

893

## 894 **Conflicts of interest**

895

896 The authors declare no conflict of interest.

897  
898

899 **References**

900

901 Aberg KA, McClay JL, Nerella S, Clark S, Kumar G, Chen W, Khachane AN, Xie L, Hudson  
902 A, Gao G, Harada A, Hultman CM, Sullivan PF, Magnusson PK, van den Oord EJ (2014):  
903 Methylo-me-wide association study of schizophrenia: identifying blood biomarker  
904 signatures of environmental insults. *JAMA Psychiatry* 71(3):255-64.

905 Adam MP, Schelley S, Gallagher R, Brady AN, Barr K, Blumberg B, Shieh JT, Graham J,  
906 Slavotinek A, Martin M, Keppler-Noreuil K, Storm AL, Hudgins L (2006): Clinical features  
907 and management issues in Mowat-Wilson syndrome. *Am J Med Genet A* 140:2730-41.

908 Akabaliev VH, Sivkov ST, Mantarkov MJ, Ahmed-Popova FM (2011): Biomarker profile of  
909 minor physical anomalies in schizophrenia patients. *Folia Med (Plovdiv)* 53:45-51.

910 Aksoy-Poyraz C, Poyraz BÇ, Turan Ş, Arıkan MK (2011): Minor physical anomalies and  
911 neurological soft signs in patients with schizophrenia and their siblings. *Psychiatry Res*  
912 190:85-90.

913 Alappat S, Zhang ZY, Chen YP (2003): Msx homeobox gene family and craniofacial  
914 development. *Cell Res* 13:429-42.

915 Albert FW, Somel M, Carneiro M, Aximu-Petri A, Halbwax M, Thalmann O, Blanco-Aguilar  
916 JA, Plyusnina IZ, Trut L, Villafuerte R, Ferrand N, Kaiser S, Jensen P, Pääbo S (2012): A  
917 comparison of brain gene expression levels in domesticated and wild animals. *PLoS Genet*  
918 8: e1002962.

919 Allen T, Willard VW, Anderson LM, Hardy KK, Bonner MJ (2016): Social functioning and  
920 facial expression recognition in children with neurofibromatosis type 1. *J Intellect Disabil*  
921 *Res* 60:282-93.

922 Amato R, Pinelli M, Monticelli A, Miele G, Coccozza S (2010): Schizophrenia and vitamin D  
923 related genes could have been subject to latitude-driven adaptation. *BMC Evol Biol* 10:351.

924 Anderson JL, Gutmann DH (2015): Neurofibromatosis type 1. *Handb Clin Neurol* 132:75-86.

925 Attanasio C, Nord AS, Zhu Y, Blow MJ, Li Z, Liberton DK, Morrison H, Plajzer-Frick I, Holt  
926 A, Hosseini R, Phouanavong S, Akiyama JA, Shoukry M, Afzal V, Rubin EM, FitzPatrick  
927 DR, Ren B, Hallgrímsson B, Pennacchio LA, Visel A (2013): Fine tuning of craniofacial  
928 morphology by distant-acting enhancers. *Science* 342(6157):1241006.

929 Au PY, Racher HE, Graham JM Jr, Kramer N, Lowry RB, Parboosingh JS, Innes AM, FORGE  
930 Canada Consortium (2014): De novo exon 1 missense mutations of SKI and Shprintzen-  
931 Goldberg syndrome: two new cases and a clinical review. *Am J Med Genet A* 164A:676-  
932 84.

933 Ayalew M, Le-Niculescu H, Levey DF, Jain N, Changala B, Patel SD, Winiger E, Breier A,  
934 Shekhar A, Amdur R, Koller D, Nurnberger JI, Corvin A, Geyer M, Tsuang MT, Salomon  
935 D, Schork NJ, Fanous AH, O'Donovan MC, Niculescu AB (2012): Convergent functional  
936 genomics of schizophrenia: from comprehensive understanding to genetic risk prediction.  
937 *Mol Psychiatry* 17(9):887-905.

938 Baranek C, Atanososki S (2012): Modulating epigenetic mechanisms: the diverse functions of  
939 Ski during cortical development. *Epigenetics* 7: 676-9.

940 Baribeau DA, Anagnostou E (2013): A comparison of neuroimaging findings in childhood  
941 onset schizophrenia and autism spectrum disorder: a review of the literature. *Front*  
942 *Psychiatry* 4:175.

943 Barnes MR, Huxley-Jones J, Maycox PR, Lennon M, Thornber A, Kelly F, Bates S, Taylor A,  
944 Reid J, Jones N, Schroeder J, Scorer CA, Davies C, Hagan JJ, Kew JN, Angelinetta C, Akbar  
945 T, Hirsch S, Mortimer AM, Barnes TR, de Bellerocche J (2011): Transcription and pathway  
946 analysis of the superior temporal cortex and anterior prefrontal cortex in schizophrenia. *J*  
947 *Neurosci Res* 89:1218-27.

- 948 Beckmann H, Lang RE, Gattaz WF (1985): Vasopressin–oxytocin in cerebrospinal fluid of  
949 schizophrenic patients and normal controls. *Psychoneuroendocrinology* 10: 187–191. Bedi  
950 U, Mishra VK, Wasilewski D, Scheel C, Johnsen SA (2014): Epigenetic plasticity: a central  
951 regulator of epithelial-to-mesenchymal transition in cancer. *Oncotarget* 5(8):2016-29.
- 952 Benítez-Burraco A (2016): A biolinguistic approach to sign languages; in Marschark M,  
953 Spencer PE (eds): *The Oxford Handbook of Deaf Studies: Language and Language*  
954 *Development*. Oxford, Oxford University Press, pp. 247-263.
- 955 Benítez-Burraco A, Boeckx C (2015): Possible functional links among brain- and skull-related  
956 genes selected in modern humans. *Front Psychol* 6:794.
- 957 Benítez-Burraco A, Lattanzi W, Murphy E (2016): Language impairments in ASD resulting  
958 from a failed domestication of the human brain. *Front Neurosci* 10:373.
- 959 Benítez-Burraco A, Murphy E (2016): The oscillopathic nature of language deficits in autism:  
960 from genes to language evolution. *Front Hum Neurosci* 10:120.
- 961 Berger SM, Bartsch D (2014): The role of L-type voltage-gated calcium channels Cav1.2 and  
962 Cav1.3 in normal and pathological brain function. *Cell Tissue Res* 357:463-76.
- 963 Bertelsen B, Melchior L, Jensen LR, Groth C, Glenthøj B, Rizzo R, Debes NM, Skov L,  
964 Brøndum-Nielsen K, Paschou P, Silaharoglu A, Tümer Z (2014): Intragenic deletions  
965 affecting two alternative transcripts of the *IMMP2L* gene in patients with Tourette  
966 syndrome. *Eur J Hum Genet* 22:1283-9.
- 967 Bigdeli TB, Ripke S, Bacanu SA, Lee SH, Wray NR, Gejman PV, Rietschel M, Cichon S, St  
968 Clair D, Corvin A, Kirov G, McQuillin A, Gurling H, Rujescu D, Andreassen OA, Werge  
969 T, Blackwood DH, Pato CN, Pato MT, Malhotra AK, O'Donovan MC, Kendler KS, Fanous  
970 AH, Schizophrenia Working Group of the Psychiatric Genomics Consortium (2016):  
971 Genome-wide association study reveals greater polygenic loading for schizophrenia in cases  
972 with a family history of illness. *Am J Med Genet B Neuropsychiatr Genet* 171B(2):276-89.
- 973 Boeckx C, Benítez-Burraco A (2014a): The shape of the human language-ready brain. *Front*  
974 *Psychol* 5:282.
- 975 Boeckx C, Benítez-Burraco A (2014b): Globularity and language-readiness: Generating new  
976 predictions by expanding the set of genes of interest. *Front Psychol* 5:1324.
- 977 Boyd PJ, Cunliffe VT, Roy S, Wood JD (2015): Sonic hedgehog functions upstream of  
978 disrupted-in-schizophrenia 1 (*disc1*): implications for mental illness. *Biol Open* 4:1336-43.
- 979 Boyle MI, Jespersgaard C, Brøndum-Nielsen K, Bisgaard AM, Tümer Z (2015): Cornelia de  
980 Lange syndrome. *Clin Genet* 88:1-12.
- 981 Bozdagi O, Wang XB, Nikitczuk JS, Anderson TR, Bloss EB, Radice GL, Zhou Q, Benson  
982 DL, Huntley GW (2010): Persistence of coordinated long-term potentiation and dendritic  
983 spine enlargement at mature hippocampal CA1 synapses requires N-cadherin. *J Neurosci*  
984 30: 9984-9.
- 985 Bradley AJ, Dinan TG (2010): A systematic review of hypothalamic-pituitary-adrenal axis  
986 function in schizophrenia: implications for mortality. *J Psychopharmacol* 24(4 Suppl):91-  
987 118.
- 988 Brei NG, Klein-Tasman BP, Schwarz GN, Casnar CL (2014): Language in young children with  
989 neurofibromatosis-1: relations to functional communication, attention, and social  
990 functioning. *Res Dev Disabil* 35:2495-504.
- 991 Brown AS (2011): The environment and susceptibility to schizophrenia. *Prog Neurobiol.*  
992 93:23-58.
- 993 Brüne M (2004): Schizophrenia-an evolutionary enigma? *Neurosci Biobehav Rev* 28:41-53.
- 994 Bury LA, Sabo SL (2014): Dynamic mechanisms of neuroligin-dependent presynaptic terminal  
995 assembly in living cortical neurons. *Neural Dev.* 29;9:13.
- 996 Cannon M, Jones PB, Murray RM (2002): Obstetric complications and schizophrenia:  
997 historical and meta-analytic review. *Am J Psychiatry* 159:1080-92.



- 998 Caronia G, Wilcoxon J, Feldman P, Grove EA (2010): Bone morphogenetic protein signaling  
999 in the developing telencephalon controls formation of the hippocampal dentate gyrus and  
1000 modifies fear-related behavior. *J Neurosci* 30: 6291-301.
- 1001 Castellano S, Parra G, Sánchez-Quinto FA, Racimo F, Kuhlwilm M, Kircher M, Sawyer S, Fu  
1002 Q, Heinze A, Nickel B, Dabney J, Siebauer M, White L, Burbano HA, Renaud G, Stenzel  
1003 U, Lalueza-Fox C, de la Rasilla M, Rosas A, Rudan P, Brajković D, Kucan Ž, Gušić I,  
1004 Shunkov MV, Derevianko AP, Viola B, Meyer M, Kelso J, Andrés AM, Pääbo S (2014):  
1005 Patterns of coding variation in the complete exomes of three Neandertals. *Proc Natl Acad  
1006 Sci USA* 111:6666-6671.
- 1007 Chang L, Kessler DS (2010): *Foxd3* is an essential Nodal-dependent regulator of zebrafish  
1008 dorsal mesoderm development. *Dev Biol* 342:39-50.
- 1009 Chen C, Cheng L, Grennan K, Pibiri F, Zhang C, Badner JA, Members of the Bipolar Disorder  
1010 Genome Study (BiGS) Consortium, Gershon ES, Liu C (2013): Two gene co-expression  
1011 modules differentiate psychotics and controls. *Mol Psychiatry* 18:1308-14. Cheung M,  
1012 Briscoe J (2003): Neural crest development is regulated by the transcription factor *Sox9*.  
1013 *Development* 130(23):5681-93.
- 1014 Cho KK, Hoch R, Lee A, T, Patel T, Rubenstein JL, Sohal VS (2015): Gamma rhythms link  
1015 prefrontal interneuron dysfunction with cognitive inflexibility in *Dlx5/6(+/-)* mice. *Neuron*  
1016 85:1332-43.
- 1017 Christophersen NS, Grønberg M, Petersen TN, Fjord-Larsen L, Jørgensen JR, Juliusson B,  
1018 Blom N, Rosenblad C, Brundin P (2007): Midbrain expression of Delta-like 1 homologue  
1019 is regulated by GDNF and is associated with dopaminergic differentiation. *Exp Neurol*  
1020 204(2):791-801.
- 1021 Ciufolini S, Dazzan P, Kempton MJ, Pariante C, Mondelli V (2014): HPA axis response to  
1022 social stress is attenuated in schizophrenia but normal in depression: evidence from a meta-  
1023 analysis of existing studies. *Neurosci Biobehav Rev* 47:359-68.
- 1024 Clarke DJ, Buckley ME (1989): Familial association of albinism and schizophrenia. *Br J*  
1025 *Psychiatry* 155:551-3.
- 1026 Cohen MM Jr (2000): Craniofacial disorders caused by mutations in homeobox genes *MSX1*  
1027 and *MSX2*. *J Craniofac Genet Dev Biol* 20:19-25.
- 1028 Compton MT, Bollini AM, McKenzie Mack L, Kryda AD, Rutland J, Weiss PS, Bercu Z,  
1029 Esterberg ML, Walker EF (2007): Neurological soft signs and minor physical anomalies in  
1030 patients with schizophrenia and related disorders, their first-degree biological relatives, and  
1031 non-psychiatric controls. *Schizophr Res* 94:64-73.
- 1032 Couplier M, Anders J, Ibáñez CF (2002): Coordinated activation of autophosphorylation sites  
1033 in the RET receptor tyrosine kinase: importance of tyrosine 1062 for GDNF mediated  
1034 neuronal differentiation and survival. *J Biol Chem* 277(3):1991-9.
- 1035 Crespi B, Badcock C (2008): Psychosis and autism as diametrical disorders of the social brain.  
1036 *Behav Brain Sci* 31:241-320.
- 1037 Crow TJ (2000): Schizophrenia as the price that homo sapiens pays for language: a resolution  
1038 of the central paradox in the origin of the species. *Brain Res Brain Res Rev.* 31:118-29.
- 1039 Darrell-Berry H, Berry K, Bucci S (2016): The relationship between paranoia and aggression  
1040 in psychosis: A systematic review. *Schizophr Res* 172:169-76. Darwin C (1871): *The  
1041 Descent of Man, and Selection in Relation to Sex*. London, John Murray.
- 1042 Datta D, Arion D, Corradi JP, Lewis DA (2015): Altered expression of CDC42 signaling  
1043 pathway components in cortical layer 3 pyramidal cells in schizophrenia. *Biol Psychiatry*  
1044 78:775-85.
- 1045 Davis MC, Green MF, Lee J, Horan WP, Senturk D, Clarke AD, Marder SR (2014): Oxytocin-  
1046 augmented social cognitive skills training in schizophrenia. *Neuropsychopharmacology* 39:  
1047 2070–2077. de Baumont A, Maschietto M, Lima L, Carraro DM, Olivieri EH, Fiorini A,

- 1048 Barreta LA, Palha JA, Belmonte-de-Abreu P, Moreira Filho CA, Brentani H (2015): Innate  
1049 immune response is differentially dysregulated between bipolar disease and schizophrenia.  
1050 *Schizophr Res* 161:215-21. De Peri L, Crescini A, Deste G, Fusar-Poli P, Sacchetti E, Vita  
1051 A (2012): Brain structural abnormalities at the onset of schizophrenia and bipolar disorder:  
1052 a meta-analysis of controlled magnetic resonance imaging studies. *Curr Pharm Des* 18:486-  
1053 94
- 1054 Deacon TW (2009): Relaxed selection and the role of epigenesis in the evolution of language;  
1055 In Blumberg M, Freeman J, Robinson J (eds): *Oxford Handbook of Developmental*  
1056 *Behavioral Neuroscience*. New York, Oxford University Press, pp. 730-752.
- 1057 Deutsch CK, Levy DL, Price SF, Bodkin JA, Boling L, Coleman MJ, Johnson F, Lerbinger J,  
1058 Matthyse S, Holzman PS (2015): Quantitative measures of craniofacial dysmorphology in  
1059 a family study of schizophrenia and bipolar illness. *Schizophr Bull* 41:1309-16. Dominguez  
1060 MH, Ayoub AE, Rakic P (2013): POU-III transcription factors (Brn1, Brn2, and Oct6)  
1061 influence neurogenesis, molecular identity, and migratory destination of upper-layer cells  
1062 of the cerebral cortex. *Cereb Cortex* 23:2632-43.
- 1063 Drerup CM, Wiora HM, Topczewski J, Morris JA (2009): *Disc1* regulates *foxd3* and *sox10*  
1064 expression, affecting neural crest migration and differentiation. *Development*  
1065 136(15):2623-32.
- 1066 Escot S, Blavet C, Faure E, Zaffran S, Duband JL, Fournier-Thibault C (2016): Disruption of  
1067 CXCR4 signaling in pharyngeal neural crest cells causes DiGeorge syndrome-like  
1068 malformations. *Development* 143:582-8.
- 1069 Feifel D, Macdonald K, Cobb P, Minassian A (2012): Adjunctive intranasal oxytocin improves  
1070 verbal memory in people with schizophrenia. *Schizophr Res* 139:207–210. Ferrarelli F,  
1071 Sarasso S, Guller Y, Riedner BA, Peterson MJ, Bellesi M, Massimini M, Postle BR, Tononi  
1072 G (2012): Reduced natural oscillatory frequency of frontal thalamocortical circuits in  
1073 schizophrenia. *Arch Gen Psychiatry* 69:766-774.
- 1074 Feifel D, Macdonald K, Nguyen A, Cobb P, Warlan H, Galangue B, Minassian A, Becker O,  
1075 Cooper J, Perry W, Lefebvre M, Gonzales J, Hadley A (2010): Adjunctive intranasal  
1076 oxytocin reduces symptoms in schizophrenia patients. *Biol Psychiatry* 68:678–680.
- 1077 Filová B, Ostatníková D, Celec P, Hodosy J (2013): The effect of testosterone on the formation  
1078 of brain structures. *Cells Tissues Organs* 197:169-77.
- 1079 Fisher SE, Francks C, Marlow AJ, MacPhie IL, Newbury DF, Newbury DF, Cardon LR,  
1080 Ishikawa-Brush Y, Richardson AJ, Talcott JB, Gayán J, Olson RK, Pennington BF, Smith  
1081 SD, DeFries JC, Stein JF, Monaco AP. (2002): Independent genome-wide scans identify a  
1082 chromosome 18 quantitative-trait locus influencing dyslexia. *Nat Genet* 30:86–91.
- 1083 Frank SM. (1978): Psycholinguistic findings in Gilles de la Tourette syndrome. *J Commun*  
1084 *Disord* 11:349-63.
- 1085 Fromer M, Pocklington AJ, Kavanagh DH, Williams HJ, Dwyer S, Gormley P, Georgieva L,  
1086 Rees E, Palta P, Ruderfer DM, Carrera N, Humphreys I, Johnson JS, Roussos P, Barker DD,  
1087 Banks E, Milanova V, Grant SG, Hannon E, Rose SA, Chambert K, Mahajan M, Scolnick  
1088 EM, Moran JL, Kirov G, Palotie A, McCarroll SA, Holmans P, Sklar P, Owen MJ, Purcell  
1089 SM, O'Donovan MC (2014): De novo mutations in schizophrenia implicate synaptic  
1090 networks. *Nature* 506(7487):179-84.
- 1091 Garavelli L, Ivanovski I, Caraffi SG, Santodirocco D, Pollazzon M, Cordelli DM, Abdalla E,  
1092 Accorsi P, Adam MP, Baldo C, Bayat A, Belligni E, Bonvicini F, Breckpot J, Callewaert B,  
1093 Cocchi G, Cuturilo G, Devriendt K, Dinulos MB, Djuric O, Epifanio R, Faravelli F,  
1094 Formisano D, Giordano L, Grasso M, Grønberg S, Iodice A, Iughetti L, Lacombe D, Maggi  
1095 M, Malbora B, Mammi I, Moutton S, Møller R, Muschke P, Napoli M, Pantaleoni C,  
1096 Pascarella R, Pellicciari A, Poch-Olive ML, Raviglione F, Rivieri F, Russo C, Savasta S,  
1097 Scarano G, Selicorni A, Silengo M, Sorge G, Tarani L, Tone LG, Toutain A, Trimouille A,

- 1098 Valera ET, Vergano SS, Zanotta N, Zollino M, Dobyns WB, Paciorkowski AR (2016):  
1099 Neuroimaging findings in Mowat-Wilson syndrome: a study of 54 patients. *Genet Med* doi:  
1100 10.1038/gim.2016.176.
- 1101 Garg S, Plasschaert E, Descheemaeker MJ, Huson S, Borghgraef M, Vogels A, Evans DG,  
1102 Legius E, Green J (2015): Autism spectrum disorder profile in neurofibromatosis type I. *J*  
1103 *Autism Dev Disord* 45:1649-57. Georgieva L, Moskvina V, Peirce T, Norton N, Bray NJ,  
1104 Jones L, Holmans P, Macgregor S, Zammit S, Wilkinson J, Williams H, Nikolov I, Williams  
1105 N, Ivanov D, Davis KL, Haroutunian V, Buxbaum JD, Craddock N, Kirov G, Owen MJ,  
1106 O'Donovan MC (2006): Convergent evidence that oligodendrocyte lineage transcription  
1107 factor 2 (OLIG2) and interacting genes influence susceptibility to schizophrenia. *Proc Natl*  
1108 *Acad Sci U S A* 103:12469-74.
- 1109 Geoffroy PA, Etain B, Houenou J (2013): Gene x environment interactions in schizophrenia  
1110 and bipolar disorder: evidence from neuroimaging. *Front Psychiatry* 4: 136.
- 1111 Gibson CM, Penn DL, Smedley KL, Leserman J, Elliott T, Pedersen CA (2014): A pilot six-  
1112 week randomized controlled trial of oxytocin on social cognition and social skills in  
1113 schizophrenia. *Schizophr Res* 156:261–265.
- 1114 Gil-Sanz C, Landeira B, Ramos C, Costa MR, Müller U (2014): Proliferative defects and  
1115 formation of a double cortex in mice lacking *Mlft4* and *Cdh2* in the dorsal telencephalon. *J*  
1116 *Neurosci* 34: 10475-87.
- 1117 Gimelli S, Capra V, Di Rocco M, Leoni M, Mirabelli-Badenier M, Schiaffino MC, Fiorio P,  
1118 Cuoco C, Gimelli G, Tassano E. (2014): Interstitial 7q31.1 copy number variations  
1119 disrupting *IMMP2L* gene are associated with a wide spectrum of neurodevelopmental  
1120 disorders. *Mol Cytogenet* 7:54.
- 1121 Girshkin L, O'Reilly N, Quidé Y, Teroganova N, Rowland JE, Schofield PR, Green MJ (2016):  
1122 Diurnal cortisol variation and cortisol response to an MRI stressor in schizophrenia and  
1123 bipolar disorder. *Psychoneuroendocrinology* 67:61-9.
- 1124 Gitton Y, Benouaiche L, Vincent C, Heude E, Soulika M, Bouhali K, Couly G, Levi G (2011):  
1125 *Dlx5* and *Dlx6* expression in the anterior neural fold is essential for patterning the dorsal  
1126 nasal capsule. *Development* 138:897-903.
- 1127 Glaser B, Mumme DL, Blasey C, Morris MA, Dahoun SP, Antonarakis SE, Reiss AL, Eliez S  
1128 (2002): Language skills in children with velocardiofacial syndrome (deletion 22q11.2). *J*  
1129 *Pediatr* 140:753-8.
- 1130 Gleeson PC, Worsley R, Gavriliadis E, Nathoo S, Ng E, Lee S, Kulkarni J (2016): Menstrual  
1131 cycle characteristics in women with persistent schizophrenia. *Aust N Z J Psychiatry* 50:481-  
1132 7. Glessner JT, Reilly MP, Kim CE, Takahashi N, Albano A, Hou C, Bradfield JP, Zhang  
1133 H, Sleiman PM, Flory JH, Imielinski M, Frackelton EC, Chiavacci R, Thomas KA, Garris  
1134 M, Otieno FG, Davidson M, Weiser M, Reichenberg A, Davis KL, Friedman JI, Cappola  
1135 TP, Margulies KB, Rader DJ, Grant SF, Buxbaum JD, Gur RE, Hakonarson H (2010):  
1136 Strong synaptic transmission impact by copy number variations in schizophrenia. *Proc Natl*  
1137 *Acad Sci U S A*. 107(23):10584-9.
- 1138 Glovinsky D, Kalogeris KT, Kirch DG, Suddath R, Wyatt RJ (1994): Cerebrospinal fluid  
1139 oxytocin concentration in schizophrenic patients does not differ from control subjects and  
1140 is not changed by neuroleptic medication. *Schizophr Res* 11:273-6.
- 1141 Godfrey C, Clement E, Mein R, Brockington M, Smith J, Talim B, Straub V, Robb S, Quinlivan  
1142 R, Feng L, Jimenez-Mallebrera C, Mercuri E, Manzur AY, Kinali M, Torelli S, Brown SC,  
1143 Sewry CA, Bushby K, Topaloglu H, North K, Abbs S, Muntoni F (2007): Refining genotype  
1144 phenotype correlations in muscular dystrophies with defective glycosylation of  
1145 dystroglycan. *Brain* 130: 2725-35.
- 1146 Gogos A, Sbisá AM, Sun J, Gibbons A, Udawela M, Dean B (2015): A Role for Estrogen in  
1147 Schizophrenia: Clinical and Preclinical Findings. *Int J Endocrinol* 2015:615356.

- 1148 Gokhman D, Lavi E, Prüfer K, Fraga MF, Riancho JA, Kelso J, Pääbo S, Meshorer E, Carmel  
1149 L (2014): Reconstructing the DNA methylation maps of the Neandertal and the Denisovan.  
1150 *Science* 344:523-527.
- 1151 Goldberg TE, Weinberger DR (2004): Genes and the parsing of cognitive processes. *Trends*  
1152 *Cogn Sci* 8: 325-35
- 1153 González-Giraldo Y, Rojas J, Novoa P, Mueller ST, Piper BJ, Adan A, Forero DA (2014):  
1154 Functional polymorphisms in BDNF and COMT genes are associated with objective  
1155 differences in arithmetical functioning in a sample of young adults. *Neuropsychobiology*  
1156 70: 152-7.
- 1157 Gourion D, Goldberger C, Bourdel MC, Jean Bayle F, L o H, Krebs MO (2004): Minor  
1158 physical anomalies in patients with schizophrenia and their parents: prevalence and pattern  
1159 of craniofacial abnormalities. *Psychiatry Res* 125:21-8.
- 1160 Gunnar MR, Wewerka S, Frenn K, Long JD, Griggs C (2009): Developmental changes in  
1161 hypothalamus-pituitary-adrenal activity over the transition to adolescence: normative  
1162 changes and associations with puberty. *Dev Psychopathol* 21:69-85.
- 1163 Gunnell D, Rasmussen F, Fouskakis D, Tynelius P, Harrison G (2003): Patterns of fetal and  
1164 childhood growth and the development of psychosis in young males: A cohort study. *Am J*  
1165 *Epidemiol* 158:291–300.
- 1166 Guris DL, Fantes J, Tara D, Druker BJ, Imamoto A (2001): Mice lacking the homologue of the  
1167 human 22q11.2 gene CRKL phenocopy neurocristopathies of DiGeorge syndrome. *Nat*  
1168 *Genet* 27:293-8.
- 1169 Haberlova J, Mitrovi c Z, Zarkovi c K, Lovri c D, Bari c V, Berlangi L, Bili c K, Fumi c K, Kranz  
1170 K, Huebner A, von der Hagen M, Barresi R, Bushby K, Straub V, Bari c I, Lochm uller H  
1171 (2014): Psycho-organic symptoms as early manifestation of adult onset POMT1-related  
1172 limb girdle muscular dystrophy. *Neuromuscul Disord* 24:990-2.
- 1173 Haddad-T ovoll R, Heide M, Zhou X, Blaess S,  lvarez-Bolado G (2012): Mouse thalamic  
1174 differentiation: gli-dependent pattern and gli-independent prepatter. *Front Neurosci* 6:27.
- 1175 Haijma SV, Van Haren N, Cahn W, Koolschijn PC, Hulshoff Pol HE, Kahn RS (2013): Brain  
1176 volumes in schizophrenia: a meta-analysis in over 18 000 subjects. *Schizophr Bull* 39:1129-  
1177 38. Hajnal A, Cs abi G, Herold R, Jeges S, Halmai T, Trixler D, Simon M, T oth  L, T enyi  
1178 T (2016): Minor physical anomalies are more common among the first-degree unaffected  
1179 relatives of schizophrenia patients - Results with the M ehes Scale. *Psychiatry Res* 237:224-  
1180 8.
- 1181 Han J, Ishii M, Bringas P Jr, Maas RL, Maxson RE Jr, Chai Y (2007): Concerted action of  
1182 Msx1 and Msx2 in regulating cranial neural crest cell differentiation during frontal bone  
1183 development. *Mech Dev* 124: 729-45.
- 1184 Hannula-Jouppi K, Kaminen-Ahola N, Taipale M, Eklund R, Nopola-Hemmi J, K aari inen H,  
1185 Kere J (2005): The axon guidance receptor gene ROBO1 is a candidate gene for  
1186 developmental dyslexia. *PLoS Genetics* 1:e50.
- 1187 Hare B, Tomasello M (2005): Human-like social skills in dogs? *Trends Cogn Sci* 9:439-444.
- 1188 Hata K, Iida J, Iwasaka H, Negoro HI, Ueda F, Kishimoto T (2003): Minor physical anomalies  
1189 in childhood and adolescent onset schizophrenia. *Psychiatry Clin Neurosci* 57:17-21.
- 1190 Hattori T, Shimizu S, Koyama Y, Emoto H, Matsumoto Y, Kumamoto N, Yamada K,  
1191 Takamura H, Matsuzaki S, Katayama T, Tohyama M, Ito A (2014): DISC1 (disrupted-in-  
1192 schizophrenia-1) regulates differentiation of oligodendrocytes. *PLoS One* 9,e88506.
- 1193 Haukka J, Suvisaari J, H akkinen L, L onnqvist J (2008): Growth pattern and risk of  
1194 schizophrenia. *Psychol Med* 38:63-70.
- 1195 Haukvik UK, Hartberg CB, Agartz I (2013): Schizophrenia--what does structural MRI show?  
1196 *Tidsskr Nor Laegeforen* 133:850-3. Havelka D, Prikrylova-Kucerova H, Prikryl R, Ceskova

- 1197 E (2016): Cognitive impairment and cortisol levels in first-episode schizophrenia patients.  
1198 Stress 19:383-9.
- 1199 Hecht EE, Gutman DA, Preuss TM, Sánchez MM, Parr LA, Rilling JK (2013): Process versus  
1200 product in social learning: comparative diffusion tensor imaging of neural systems for action  
1201 execution-observation matching in macaques, chimpanzees, and humans. Cortex 23:1014-  
1202 1024.
- 1203 Hegarty SV, Sullivan AM, O'Keefe GW (2015): Zeb2: A multifunctional regulator of nervous  
1204 system development. Prog Neurobiol 132: 81-95.
- 1205 Hempel RJ, Tulen JH, van Beveren NJ, Röder CH, de Jong FH, Hengeveld MW (2010):  
1206 Diurnal cortisol patterns of young male patients with schizophrenia. Psychiatry Clin  
1207 Neurosci 64:548-54.
- 1208 Hetz S, Acikgoez A, Voss U, Nieber K, Holland H, Hegewald C, Till H, Metzger R, Metzger  
1209 M (2014): In vivo transplantation of neurosphere-like bodies derived from the human  
1210 postnatal and adult enteric nervous system: a pilot study. PLoS One 9(4):e93605.
- 1211 Hinzen W, Rosselló J (2015): The linguistics of schizophrenia: thought disturbance as language  
1212 pathology across positive symptoms. Front Psychol 6:971.
- 1213 Hirayasu Y, Shenton ME, Salisbury DF, Dickey CC, Fischer IA, Mazzoni P, Kisler T, Arakaki  
1214 H, Kwon JS, Anderson JE, Yurgelun-Todd D, Tohen M, McCarley RW (1998): Lower left  
1215 temporal lobe MRI volumes in patients with first-episode schizophrenia compared with  
1216 psychotic patients with first episode affective disorder and normal subjects. Am J Psychiatry  
1217 155:1384-1391.
- 1218 Ho BC, Epping E, Wang K, Andreasen NC, Librant A, Wassink TH (2008): Basic helix-loop-  
1219 helix transcription factor NEUROG1 and schizophrenia: effects on illness susceptibility,  
1220 MRI brain morphometry and cognitive abilities. Schizophr Res 106:192-9.
- 1221 Hochman KM, Lewine RR (2004): Age of menarche and schizophrenia onset in women.  
1222 Schizophr Res 69:183-8.
- 1223 Iannuzzi S, Albaret JM, Chignac C, Faure-Marie N, Barry I, Karsenty C, Chaix Y (2016):  
1224 Motor impairment in children with Neurofibromatosis type 1: Effect of the comorbidity with  
1225 language disorders. Brain Dev 38:181-7.
- 1226 Ismail B, Cantor-Graae E, McNeil TF (1998): Minor physical anomalies in schizophrenic  
1227 patients and their siblings. Am J Psychiatry 155:1695-702.
- 1228 Iwashiro N, Koike S, Satomura Y, Suga M, Nagai T, Natsubori T, Tada M, Gonoï W, Takizawa  
1229 R, Kunitatsu A, Yamasue H, Kasai K (2016): Association between impaired brain activity  
1230 and volume at the sub-region of Broca's area in ultra-high risk and first-episode  
1231 schizophrenia: A multi-modal neuroimaging study. Schizophr Res 172:9-15.
- 1232 Jasińska KK, Molfese PJ, Kornilov SA, Mencl WE, Frost SJ, Lee M, Pugh KR, Grigorenko  
1233 EL, Landi N (2016): The BDNF Val66Met polymorphism influences reading ability and  
1234 patterns of neural activation in children. PLoS One 11:e0157449.
- 1235 Jing J, Ren Y, Zong Z, Liu C, Kamiya N, Mishina Y, Liu Y, Zhou X, Feng JQ (2013): BMP  
1236 receptor 1A determines the cell fate of the postnatal growth plate. Int J Biol Sci 9(9):895-  
1237 906.
- 1238 Jing S, Wen D, Yu Y, Holst PL, Luo Y, Fang M, Tamir R, Antonio L, Hu Z, Cupples R, Louis  
1239 JC, Hu S, Altrock BW, Fox GM (1996): GDNF-induced activation of the ret protein tyrosine  
1240 kinase is mediated by GDNFR-alpha, a novel receptor for GDNF. Cell 85(7):1113-24.
- 1241 Jones EG, Rubenstein JLR (2004): Expression of regulatory genes during differentiation of  
1242 thalamic nuclei in mouse and monkey. J Comp Neurol 477:55-80.
- 1243 Kabir ZD, Lee AS, Rajadhyaksha AM (2016): L-type Ca<sup>2+</sup> channels in mood, cognition and  
1244 addiction: integrating human and rodent studies with a focus on behavioural  
1245 endophenotypes. J Physiol 594:5823-5837.

- 1246 Kadowaki M, Nakamura S, Machon O, Krauss S, Radice GL, Takeichi M (2007): N-cadherin  
1247 mediates cortical organization in the mouse brain. *Dev Biol* 304: 22-33.
- 1248 Kagawa, H, Yamada, H., Lin, R-S, Mizuta, T, Hasegawa T, Okanoya K (2012): Ecological  
1249 correlates of song complexity in white-rumped munias: the implication of relaxation of  
1250 selection as a cause for signal variation in birdsong. *Interact Stud* 13:263-284.
- 1251 Kebir O, Mouaffak F, Chayet M, Leroy S, Tordjman S, Amado I, Krebs MO (2009): Semantic  
1252 but not phonological verbal fluency associated with BDNF Val66Met polymorphism in  
1253 schizophrenia. *Am J Med Genet B Neuropsychiatr Genet* 150B:441-2. Khadka D, Luo T,  
1254 Sargent TD (2006): *Msx1* and *Msx2* have shared essential functions in neural crest but may  
1255 be dispensable in epidermis and axis formation in *Xenopus*. *Int J Dev Biol* 50:499-502.
- 1256 Keller A, Castellanos FX, Vaituzis AC, Jeffries NO, Giedd JN, Rapoport JL (2003):  
1257 Progressive loss of cerebellar volume in childhood-onset schizophrenia. *Am J Psychiatry*  
1258 160: 128-33.
- 1259 Kielar C, Wishart TM, Palmer A, Dihanich S, Wong AM, Macauley SL, Chan CH, Sands MS,  
1260 Pearce DA, Cooper JD, Gillingwater TH (2009): Molecular correlates of axonal and  
1261 synaptic pathology in mouse models of Batten disease. *Hum Mol Genet* 18:4066-80.
- 1262 Kircher TT, Oh TM, Brammer MJ, McGuire PK (2005): Neural correlates of syntax production  
1263 in schizophrenia. *Br J Psychiatry* 186: 209-14.
- 1264 Kraus P, Lufkin T (2006): *Dlx* homeobox gene control of mammalian limb and craniofacial  
1265 development. *Am J Med Genet A* 140:1366-1374.
- 1266 Krishnan S, Watkins KE, Bishop DV (2016): Neurobiological basis of language learning  
1267 difficulties. *Trends Cogn Sci* 20: 701-14.
- 1268 Lamminranta S, Aberg LE, Autti T, Moren R, Laine T, Kaukoranta J, Santavuori P. (2001):  
1269 Neuropsychological test battery in the follow-up of patients with juvenile neuronal ceroid  
1270 lipofuscinosis. *J Intellect Disabil Res* 45:8-17.
- 1271 Lanz TA, Guilmette E, Gosink MM, Fischer JE, Fitzgerald LW, Stephenson DT, Pletcher MT  
1272 (2013): Transcriptomic analysis of genetically defined autism candidate genes reveals  
1273 common mechanisms of action. *Mol Autism* 15;4(1):45.
- 1274 Lapiere D, Braun CM, Hodgins S, Toupin J, Léveillé S, Constantineau C (1995):  
1275 Neuropsychological correlates of violence in schizophrenia. *Schizophr Bull* 21:253-62.
- 1276 Lattanzi W (2016): Molecular genetics of craniosynostosis. eLS. John Wiley & Sons, Ltd:  
1277 Chichester. doi: 10.1002/9780470015902.a0025186
- 1278 Lattanzi W, Barba M, Di Pietro L, Boyadjiev SA. Genetic advances in craniosynostosis. *Am J*  
1279 *Med Genet A* doi: 10.1002/ajmg.a.38159.
- 1280 Ledda F, Paratcha G, Sandoval-Guzman T, Ibanez CF (2007): GDNF and GFR alpha 1 promote  
1281 formation of neuronal synapses by ligand-induced cell adhesion. *Nat Neurosci* 10:293–300.
- 1282 Leoni V, Caccia C (2015): The impairment of cholesterol metabolism in Huntington disease.  
1283 *Biochim Biophys Acta* 1851:1095-105.
- 1284 Li J, Wilkinson B, Clementel VA, Hou J, O'Dell TJ, Coba MP (2016): Long-term potentiation  
1285 modulates synaptic phosphorylation networks and reshapes the structure of the postsynaptic  
1286 interactome. *Sci Signal* 9:rs8. Li N, Bartlett CW (2012): Defining the genetic architecture  
1287 of human developmental language impairment. *Life Sci* 90:469-75.
- 1288 Li X, Black M, Xia S, Zhan C, Bertisch HC, Branch CA, DeLisi LE (2015): Subcortical  
1289 structure alterations impact language processing in individuals with schizophrenia and those  
1290 at high genetic risk. *Schizophr Res* 169:76-82.
- 1291 Li X, Branch CA, DeLisi LE (2009): Language pathway abnormalities in schizophrenia: a  
1292 review of fMRI and other imaging studies. *Curr Opin Psychiatry* 22:131-9.
- 1293 Liang J, Von den Hoff J, Lange J, Ren Y, Bian Z, Carels CE (2016): *MSX1* mutations and  
1294 associated disease phenotypes: genotype-phenotype relations. *Eur J Hum Genet* 24:1663-  
1295 1670.

- 1296 Liberg B, Rahm C, Panayiotou A, Pantelis C (2016): Brain change trajectories that differentiate  
1297 the major psychoses. *Eur J Clin Invest* 46:658-74. Lin Y, Ma X, Deng W, Han Y, Li M, Liu  
1298 X, Loh el-W, Li T (2012): Minor physical anomalies in patients with schizophrenia in a  
1299 Chinese population. *Psychiatry Res* 200:223-7.
- 1300 Link AS, Kurinna S, Havlicek S, Lehnert S, Reichel M, Kornhuber J, Winner B, Huth T, Zheng  
1301 F, Werner S, Alzheimer C (2016): *Kdm6b* and *Pmepal* as targets of bioelectrically and  
1302 behaviorally induced activin A signaling. *Mol Neurobiol* 53: 4210-25.
- 1303 Liu JA, Wu MH, Yan CH, Chau BK, So H (2013): Phosphorylation of Sox9 is required for  
1304 neural crest delamination and is regulated downstream of BMP and canonical Wnt  
1305 signalling. *Proc Natl Acad Sci USA* 110:2882–2887.
- 1306 Liu Y, Harding M, Pittman A, Dore J, Striessnig J, Rajadhyaksha A, Chen X (2014): Cav1.2  
1307 and Cav1.3 L-type calcium channels regulate dopaminergic firing activity in the mouse  
1308 ventral tegmental area. *J Neurophysiol* 112:1119-30. Lopez LM, Harris SE, Luciano M,  
1309 Liewald D, Davies G, Gow AJ, Tenesa A, Payton A, Ke X, Whalley LJ, Fox H, Haggerty  
1310 P, Ollier W, Pickles A, Porteous DJ, Horan MA, Pendleton N, Starr JM, Deary IJ (2012):  
1311 Evolutionary conserved longevity genes and human cognitive abilities in elderly cohorts.  
1312 *Eur J Hum Genet* 20:341-7.
- 1313 Lorenzo J, Barton B, Arnold SS, North KN (2013): Cognitive features that distinguish  
1314 preschool-age children with neurofibromatosis type 1 from their peers: a matched case-  
1315 control study. *J Pediatr* 163:1479-83.e1. Lorenzo J, Barton B, Arnold SS, North KN (2015):  
1316 Developmental trajectories of young children with neurofibromatosis type 1: a longitudinal  
1317 study from 21 to 40 months of age. *J Pediatr* 166:1006-12.e1.
- 1318 Lupyan G, Dale R (2010): Language structure is partly determined by social structure. *PLoS*  
1319 *One* 5:e8559.
- 1320 Lyons GE, Micales BK, Herr MJ, Horrigan SK, Namciu S, Shardy D, Stavnezer E (1994):  
1321 Protooncogene *c-ski* is expressed in both proliferating and postmitotic neuronal populations.  
1322 *Dev Dyn* 201: 354-65.
- 1323 Mariani LL, Tesson C, Charles P, Cazeneuve C, Hahn V, Youssov K, Freeman L, Grabli D,  
1324 Roze E, Noël S, Peuvion JN, Bachoud-Levi AC, Brice A, Stevanin G, Durr A (2016):  
1325 Expanding the spectrum of genes involved in Huntington disease using a combined clinical  
1326 and genetic approach. *JAMA Neurol* 73:1105-14. Marschallinger J, Sah A, Schmuckermair  
1327 C, Unger M, Rotheneichner P, Kharitonova M, Waclawiczek A, Gerner P, Jaksch-  
1328 Bogensperger H, Berger S, Striessnig J, Singewald N, Couillard-Despres S, Aigner L  
1329 (2015): The L-type calcium channel Cav1.3 is required for proper hippocampal  
1330 neurogenesis and cognitive functions. *Cell Calcium* 58:606-16.
- 1331 Mariën P, Ackermann H, Adamaszek M, Barwood CH, Beaton A, Desmond J, De Witte E,  
1332 Fawcett AJ, Hertrich I, Küper M, Leggio M, Marvel C, Molinari M, Murdoch BE, Nicolson  
1333 RI, Schmahmann JD, Stoodley CJ, Thürling M, Timmann D, Wouters E, Ziegler W (2014):  
1334 Consensus paper: Language and the cerebellum: an ongoing enigma. *Cerebellum* 13: 386-  
1335 410.
- 1336 Martinez-Garay I, Gil-Sanz C, Franco SJ, Espinosa A, Molnár Z, Mueller U (2016): Cadherin  
1337 2/4 signaling via PTP1B and catenins is crucial for nucleokinesis during radial neuronal  
1338 migration in the neocortex. *Development* 143: 2121-34.
- 1339 Martins-de-Souza D, Gattaz WF, Schmitt A, Novello JC, Marangoni S, Turck CW, Dias-Neto  
1340 E (2009): Proteome analysis of schizophrenia patients Wernicke's area reveals an energy  
1341 metabolism dysregulation. *BMC Psychiatry* 9:17. Mascheretti S, Riva V, Giorda R, Beri S,  
1342 Lanzoni LF, Cellino MR, Marino C (2014): KIAA0319 and ROBO1: evidence on  
1343 association with reading and pleiotropic effects on language and mathematics abilities in  
1344 developmental dyslexia. *J Hum Genet* 59: 189-97.

- 1345 Mauney SA, Pietersen CY, Sonntag KC, Woo TU. (2015): Differentiation of oligodendrocyte  
1346 precursors is impaired in the prefrontal cortex in schizophrenia. *Schizophr Res* 169(1-  
1347 3):374-80.
- 1348 McDonald-McGinn DM, Feret H, Nah HD, Bartlett SP, Whitaker LA, Zackai EH (2010):  
1349 Metopic craniosynostosis due to mutations in *GLI3*: A novel association. *Am J Med Genet*  
1350 *A* 152A:1654-60.
- 1351 McGrath J, El-Saadi O, Grim V, Cardy S, Chapple B, Chant D, Lieberman D, Mowry B (2002):  
1352 Minor physical anomalies and quantitative measures of the head and face in patients with  
1353 psychosis. *Arch Gen Psychiatry* 59:458-64.
- 1354 McLarren KW, Litsiou A, Streit A (2003): *DLX5* positions the neural crest and preplacode  
1355 region at the border of the neural plate. *Dev Biol* 259:34-47.
- 1356 Michelato A, Bonvicini C, Ventriglia M, Scassellati C, Randazzo R, Bignotti S, Beneduce R,  
1357 Riva MA, Gennarelli M (2004): 3'UTR (AGG)<sub>n</sub> repeat of glial cell line-derived  
1358 neurotrophic factor (GDNF) gene polymorphism in schizophrenia. *Neurosci Lett* 357:235-  
1359 7.
- 1360 Modabbernia A, Rezaei F, Salehi B, Jafarinia M, Ashrafi M, Tabrizi M, Hosseini SM, Tajdini  
1361 M, Ghaleiha A, Akhondzadeh S (2013): Intranasal oxytocin as an adjunct to risperidone in  
1362 patients with schizophrenia: an 8-week, randomized, double-blind, placebo-controlled  
1363 study. *CNS Drugs* 27: 57–65.
- 1364 Mølsted K, Boers M, Kjaer I (2010): The morphology of the sella turcica in velocardiocardiofacial  
1365 syndrome suggests involvement of a neural crest developmental field. *Am J Med Genet A*  
1366 152A:1450-7.
- 1367 Montano C, Taub MA, Jaffe A, Briem E, Feinberg JI, Trygvadottir R, Idrizi A, Runarsson A,  
1368 Berndsen B, Gur RC, Moore TM, Perry RT, Fugman D, Sabunciyani S, Yolken RH, Hyde  
1369 TM, Kleinman JE, Sobell JL, Pato CN, Pato MT, Go RC, Nimgaonkar V, Weinberger DR,  
1370 Braff D, Gur RE, Fallin MD, Feinberg AP (2016): Association of DNA Methylation  
1371 Differences With Schizophrenia in an Epigenome-Wide Association Study. *JAMA*  
1372 *psychiatry* 73(5): 506-14.
- 1373 Moore L, Kyaw M, Vercammen A, Lenroot R, Kulkarni J, Curtis J, O'Donnell M, Carr VJ,  
1374 Shannon Weickert C, Weickert TW (2013): Serum testosterone levels are related to  
1375 cognitive function in men with schizophrenia. *Psychoneuroendocrinology* 38:1717-28.
- 1376 Moran P, Stokes J, Marr J, Bock G, Desbonnet L, Waddington J, O'Tuathaigh C (2016): Gene  
1377 × environment interactions in schizophrenia: evidence from genetic mouse models. *Neural*  
1378 *Plast* 2016: 2173748.
- 1379 Murphy E (2015): The brain dynamics of linguistic computation. *Front Psychol* 6:1515.
- 1380 Murphy E, Benítez-Burraco A (2016a): Bridging the gap between genes and language deficits  
1381 in schizophrenia: an oscillopathic approach. *Front Hum Neurosci* 10:422.
- 1382 Murphy E, Benítez-Burraco A (2016b): Language deficits in schizophrenia and autism as  
1383 related oscillatory connectopathies: an evolutionary account. *Neurosci Biobehav Rev*  
1384 S0149-7634(16)30155-5.
- 1385 Noroozian M (2014): The role of the cerebellum in cognition: beyond coordination in the  
1386 central nervous system. *Neurol Clin* 32: 1081-104.
- 1387 O'Donovan MC, Norton N, Williams H, Peirce T, Moskvina V, Nikolov I, Hamshere M,  
1388 Carroll L, Georgieva L, Dwyer S, Holmans P, Marchini JL, Spencer CC, Howie B, Leung  
1389 HT, Giegling I, Hartmann AM, Möller HJ, Morris DW, Shi Y, Feng G, Hoffmann P,  
1390 Propping P, Vasilescu C, Maier W, Rietschel M, Zammit S, Schumacher J, Quinn EM,  
1391 Schulze TG, Iwata N, Ikeda M, Darvasi A, Shifman S, He L, Duan J, Sanders AR, Levinson  
1392 DF, Adolfsson R, Osby U, Terenius L, Jönsson EG, Cichon S, Nöthen MM, Gill M, Corvin  
1393 AP, Rujescu D, Gejman PV, Kirov G, Craddock N, Williams NM, Owen MJ; Molecular  
1394 Genetics of Schizophrenia Collaboration (2009): Analysis of 10 independent samples



- 1395 provides evidence for association between schizophrenia and a SNP flanking fibroblast  
1396 growth factor receptor 2. *Mol Psychiatry* 14:30-6.
- 1397 Okada N, Fukunaga M, Yamashita F, Koshiyama D, Yamamori H, Ohi K, Yasuda Y, Fujimoto  
1398 M, Watanabe Y, Yahata N, Nemoto K, Hibar DP, van Erp TG, Fujino H, Isobe M, Isomura  
1399 S, Natsubori T, Narita H, Hashimoto N, Miyata J, Koike S, Takahashi T, Yamasue H,  
1400 Matsuo K, Onitsuka T, Iidaka T, Kawasaki Y, Yoshimura R, Watanabe Y, Suzuki M, Turner  
1401 JA, Takeda M, Thompson PM, Ozaki N, Kasai K, Hashimoto R (2016): Abnormal  
1402 asymmetries in subcortical brain volume in schizophrenia. *Mol Psychiatry* 21(10):1460-6.
- 1403 Oliva JL, Rault JL, Appleton B, Lill A (2015): Oxytocin enhances the appropriate use of  
1404 human social cues by the domestic dog (*Canis familiaris*) in an object choice task. *Anim*  
1405 *Cogn.* 18:767-75.
- 1406 Otreba M, Wrześniok D, Beberok A, Rok J, Buszman E (2015): Melanogenesis and antioxidant  
1407 defense system in normal human melanocytes cultured in the presence of chlorpromazine.  
1408 *Toxicol In Vitro* 29:221-7.
- 1409 Owen MJ, Sawa A, Mortensen PB (2016): Schizophrenia. *Lancet* 388:86-97.
- 1410 Palaniyappan L, Mallikarjun P, Joseph V, White TP, Liddle PF (2011): Regional contraction  
1411 of brain surface area involves three large-scale networks in schizophrenia. *Schizophr Res*  
1412 129:163-8.
- 1413 Palomino A, Vallejo-Illarramendi A, González-Pinto A, Aldama A, González-Gómez C,  
1414 Mosquera F, González-García G, Matute C (2006): Decreased levels of plasma BDNF in  
1415 first-episode schizophrenia and bipolar disorder patients. *Schizophr Research* 86:321–22.
- 1416 Parisi L, Di Filippo T, Roccella M (2015): Behavioral phenotype and Autism Spectrum  
1417 Disorders in Cornelia de Lange syndrome. *Ment Illn* 7:5988. Paylor R, Glaser B, Mupo A,  
1418 Atalio P, Spencer C, Sobotka A, Sparks C, Choi CH, Oghalai J, Curran S, Murphy KC,  
1419 Monks S, Williams N, O'Donovan MC, Owen MJ, Scambler PJ, Lindsay E (2006): *Tbx1*  
1420 haploinsufficiency is linked to behavioral disorders in mice and humans: implications for  
1421 22q11 deletion syndrome. *Proc Natl Acad Sci U S A* 103:7729-34.
- 1422 Park DH, Hong SJ, Salinas RD, Liu SJ, Sun SW, Sgualdino J, Testa G, Matzuk MM, Iwamori  
1423 N, Lim DA (2014): Activation of neuronal gene expression by the JMJD3 demethylase is  
1424 required for postnatal and adult brain neurogenesis. *Cell Rep* 8: 1290-9.
- 1425 Payne JM, Porter M, Pride NA, North KN (2016): Theory of mind in children with  
1426 Neurofibromatosis Type 1. *Neuropsychology* 30:439-48.
- 1427 Pearlson GD, Folley BS (2008): Schizophrenia, psychiatric genetics, and Darwinian  
1428 psychiatry: an evolutionary framework. *Schizophr Bull* 34:722-33.
- 1429 Peter B, Wijsman EM, Nato AQ Jr; University of Washington Center for Mendelian Genomics,  
1430 Matsushita MM, Chapman KL, Stanaway IB, Wolff J, Oda K, Gabo VB, Raskind WH  
1431 (2016): Genetic candidate variants in two multigenerational families with childhood apraxia  
1432 of speech. *PLoS One* 11:e0153864. Petrella LI, Cai Y, Sereno JV, Gonçalves SI, Silva AJ,  
1433 Castelo-Branco M (2016): Brain and behaviour phenotyping of a mouse model of  
1434 neurofibromatosis type-1: an MRI/DTI study on social cognition. *Genes Brain Behav*  
1435 15:637-46. Pinggera A, Lieb A, Benedetti B, Lampert M, Monteleone S, Liedl KR, Tuluc  
1436 P, Striessnig J (2015): CACNA1D de novo mutations in autism spectrum disorders activate  
1437 Cav1.3 L-type calcium channels. *Biol Psychiatry* 77:816-22.
- 1438 Potkin SG, Macciardi F, Guffanti G, Fallon JH, Wang Q, Turner JA, Lakatos A, Miles MF,  
1439 Lander A, Vawter MP, Xie X (2010): Identifying gene regulatory networks in  
1440 schizophrenia. *Neuroimage* 53:839-47.
- 1441 Potkin SG, Turner JA, Guffanti G, Lakatos A, Fallon JH, Nguyen DD, Mathalon D, Ford J,  
1442 Lauriello J, Macciardi F, FBIRN (2009): A genome-wide association study of schizophrenia  
1443 using brain activation as a quantitative phenotype. *Schizophr Bull* 35:96-108.

- 1444 Praharaj SK, Sarkar S, Sinha VK (2012): External ear abnormalities in existing scales for minor  
1445 physical anomalies: are they enough? *Psychiatry Res* 198:324-6.
- 1446 Purcell SM, Moran JL, Fromer M, Ruderfer D, Solovieff N, Roussos P, O'Dushlaine C,  
1447 Chambert K, Bergen SE, Kähler A, Duncan L, Stahl E, Genovese G, Fernández E, Collins  
1448 MO, Komiyama NH, Choudhary JS, Magnusson PK, Banks E, Shakir K, Garimella K,  
1449 Fennell T, DePristo M, Grant SG, Haggarty SJ, Gabriel S, Scolnick EM, Lander ES,  
1450 Hultman CM, Sullivan PF, McCarroll SA, Sklar P (2014): A polygenic burden of rare  
1451 disruptive mutations in schizophrenia. *Nature* 506(7487):185-90. .
- 1452 Rajchgot H, Fathalli F, Rajchgot P, Menezes N, Joober R, Boksa P (2009): Decreased tooth  
1453 size in schizophrenia. *Schizophr Res* 110:194-6. Ramanathan S, Miewald J, Montrose D,  
1454 Keshavan MS (2015): Can age at sexual maturity act as a predictive biomarker for  
1455 prodromal negative symptoms? *Schizophr Res* 164:35-9.
- 1456 Ramsey JM, Schwarz E, Guest PC, van Beveren NJ, Leweke FM, Rothermundt M, Bogerts B,  
1457 Steiner J, Bahn S (2013): Distinct molecular phenotypes in male and female schizophrenia  
1458 patients. *PLoS One* 8:e78729.
- 1459 Ravasi T, Suzuki H, Cannistraci CV, Katayama S, Bajic VB, Tan K, Akalin A, Schmeier S,  
1460 Kanamori-Katayama M, Bertin N, Carninci P, Daub CO, Forrest AR, Gough J, Grimmond  
1461 S, Han JH, Hashimoto T, Hide W, Hofmann O, Kamburov A, Kaur M, Kawaji H, Kubosaki  
1462 A, Lassmann T, van Nimwegen E, MacPherson CR, Ogawa C, Radovanovic A, Schwartz  
1463 A, Teasdale RD, Tegnér J, Lenhard B, Teichmann SA, Arakawa T, Ninomiya N, Murakami  
1464 K, Tagami M, Fukuda S, Imamura K, Kai C, Ishihara R, Kitazume Y, Kawai J, Hume DA,  
1465 Ideker T, Hayashizaki Y(2010): An atlas of combinatorial transcriptional regulation in  
1466 mouse and man. *Cell* 140(5):744-52.
- 1467 Rehkämper G, Frahm HD, Cnotka J (2008): Mosaic evolution and adaptive brain component  
1468 alteration under domestication seen on the background of evolutionary theory. *Brain Behav*  
1469 *Evol* 71: 115-26.
- 1470 Rich AM, Cho YT, Tang Y, Savic A, Krystal JH, Wang F, Xu K, Anticevic A (2016):  
1471 Amygdala volume is reduced in early course schizophrenia. *Psychiatry Res* 250:50-60.
- 1472 Richter R, Rorbach J, Pajak A, Smith PM, Wessels HJ, Huynen MA, Smeitink JA, Lightowlers  
1473 RN, Chrzanowska-Lightowlers ZM (2010): A functional peptidyl-tRNA hydrolase, ICT1,  
1474 has been recruited into the human mitochondrial ribosome. *EMBO J* 29(6):1116-25.
- 1475 Ripke S, O'Dushlaine C, Chambert K, Moran JL, Kähler AK, Akterin S, Bergen SE, Collins  
1476 AL, Crowley JJ, Fromer M, Kim Y, Lee SH, Magnusson PK, Sanchez N, Stahl EA,  
1477 Williams S, Wray NR, Xia K, Bettella F, Borglum AD, Bulik-Sullivan BK, Cormican P,  
1478 Craddock N, de Leeuw C, Durmishi N, Gill M, Golimbet V, Hamshere ML, Holmans P,  
1479 Hougaard DM, Kendler KS, Lin K, Morris DW, Mors O, Mortensen PB, Neale BM, O'Neill  
1480 FA, Owen MJ, Milovancevic MP, Posthuma D, Powell J, Richards AL, Riley BP, Ruderfer  
1481 D, Rujescu D, Sigurdsson E, Silagadze T, Smit AB, Stefansson H, Steinberg S, Suvisaari J,  
1482 Tosato S, Verhage M, Walters JT; Multicenter Genetic Studies of Schizophrenia  
1483 Consortium., Levinson DF, Gejman PV, Kendler KS, Laurent C, Mowry BJ, O'Donovan  
1484 MC, Owen MJ, Pulver AE, Riley BP, Schwab SG, Wildenauer DB, Dudbridge F, Holmans  
1485 P, Shi J, Albus M, Alexander M, Campion D, Cohen D, Dikeos D, Duan J, Eichhammer P,  
1486 Godard S, Hansen M, Lerer FB, Liang KY, Maier W, Mallet J, Nertney DA, Nestadt G,  
1487 Norton N, O'Neill FA, Papadimitriou GN, Ribble R, Sanders AR, Silverman JM, Walsh D,  
1488 Williams NM, Wormley B; Psychosis Endophenotypes International Consortium, Arranz  
1489 MJ, Bakker S, Bender S, Bramon E, Collier D, Crespo-Facorro B, Hall J, Iyegbe C,  
1490 Jablensky A, Kahn RS, Kalaydjieva L, Lawrie S, Lewis CM, Lin K, Linszen DH, Mata I,  
1491 McIntosh A, Murray RM, Ophoff RA, Powell J, Rujescu D, Van Os J, Walshe M, Weisbrod  
1492 M, Wiersma D; Wellcome Trust Case Control Consortium 2., Donnelly P, Barroso I,  
1493 Blackwell JM, Bramon E, Brown MA, Casas JP, Corvin AP, Deloukas P, Duncanson A,

- 1494 Jankowski J, Markus HS, Mathew CG, Palmer CN, Plomin R, Rautanen A, Sawcer SJ,  
1495 Trembath RC, Viswanathan AC, Wood NW, Spencer CC, Band G, Bellenguez C, Freeman  
1496 C, Hellenthal G, Giannoulatou E, Pirinen M, Pearson RD, Strange A, Su Z, Vukcevic D,  
1497 Donnelly P, Langford C, Hunt SE, Edkins S, Gwilliam R, Blackburn H, Bumpstead SJ,  
1498 Dronov S, Gillman M, Gray E, Hammond N, Jayakumar A, McCann OT, Liddle J, Potter  
1499 SC, Ravindrarajah R, Ricketts M, Tashakkori-Ghanbaria A, Waller MJ, Weston P, Widaa  
1500 S, Whittaker P, Barroso I, Deloukas P, Mathew CG, Blackwell JM, Brown MA, Corvin AP,  
1501 McCarthy MI, Spencer CC, Bramon E, Corvin AP, O'Donovan MC, Stefansson K, Scolnick  
1502 E, Purcell S, McCarroll SA, Sklar P, Hultman CM, Sullivan PF (2013): Genome-wide  
1503 association analysis identifies 13 new risk loci for schizophrenia. *Nat Genet* 45(10):1150-9.  
1504 Romano A, Tempesta B, Micioni Di Bonaventura MV, Gaetani S (2016): From autism to eating  
1505 disorders and more: the role of oxytocin in neuropsychiatric disorders. *Front Neurosci*  
1506 9:497. Romero T, Nagasawa M, Mogi K, Hasegawa T, Kikusui T (2015): Intranasal  
1507 administration of oxytocin promotes social play in domestic dogs. *Commun Integr Biol*  
1508 8:e1017157.  
1509 Rosa JC, César MC (2016): Role of hexokinase and VDAC in neurological disorders. *Curr Mol*  
1510 *Pharmacol* 9:320-331.  
1511 Ruest LB, Hammer RE, Yanagisawa M, Clouthier DE (2003): *Dlx5/6*-enhancer directed  
1512 expression of Cre recombinase in the pharyngeal arches and brain. *Genesis* 37:188-194.  
1513 Ruzicka WB, Subburaju S, Benes FM (2015): Circuit- and diagnosis-specific DNA  
1514 methylation changes at  $\gamma$ -aminobutyric acid-related genes in postmortem human  
1515 hippocampus in schizophrenia and bipolar disorder. *JAMA Psychiatry* 72:541-51.  
1516 Sajan SA, Rubenstein JL, Warchol ME, Lovett M (2011): Identification of direct downstream  
1517 targets of *Dlx5* during early inner ear development. *Hum Mol Genet* 20:1262-73.  
1518 Sakane F, Miyamoto Y (2013): N-cadherin regulates the proliferation and differentiation of  
1519 ventral midbrain dopaminergic progenitors. *Dev Neurobiol* 73: 518-29.  
1520 Salmela E, Renvall H, Kujala J, Hakosalo O, Illman M, Vihla M, Leinonen E, Salmelin R,  
1521 Kere J (2016): Evidence for genetic regulation of the human parieto-occipital 10-Hz  
1522 rhythmic activity. *Eur J Neurosci* 44:1963-71.  
1523 Sánchez-Villagra MR, Geiger M, Schneider RA (2016): The taming of the neural crest: a  
1524 developmental perspective on the origins of morphological covariation in domesticated  
1525 mammals. *R Soc Open Sci* 3:160107.  
1526 Sans-Sansa B, McKenna PJ, Canales-Rodríguez EJ, Ortiz-Gil J, López-Araquistain L, Sarró S,  
1527 Dueñas RM, Blanch J, Salvador R, Pomarol-Clotet E (2013): Association of formal thought  
1528 disorder in schizophrenia with structural brain abnormalities in language-related cortical  
1529 regions. *Schizophr Res* 146:308-13.  
1530 Sasai N, Kutejova E, Briscoe J (2014): Integration of signals along orthogonal axes of the  
1531 vertebrate neural tube controls progenitor competence and increases cell diversity. *PLoS*  
1532 *Biol* 12(7):e1001907.  
1533 Sasayama D, Hattori K, Teraishi T, Hori H, Ota M, Yoshida S, Arima K, Higuchi T, Amano  
1534 N, Kunugi H (2012): Negative correlation between cerebrospinal fluid oxytocin levels and  
1535 negative symptoms of male patients with schizophrenia. *Schizophr Res* 139:201–206.  
1536 Saugstad LF (1989a): Mental illness and cognition in relation to age at puberty: a hypothesis.  
1537 *Clin Genet* 36:156-67.  
1538 Saugstad LF (1989b): Age at puberty and mental illness. Towards a neurodevelopmental  
1539 aetiology of Kraepelin's endogenous psychoses. *Br J Psychiatry* 155:536-44.  
1540 Schneider SA, Marshall KE, Xiao J, LeDoux MS (2012): JPH3 repeat expansions cause a  
1541 progressive akinetic-rigid syndrome with severe dementia and putaminal rim in a five-  
1542 generation African-American family. *Neurogenetics* 13:133-40. Seixas AI, Holmes SE,  
1543 Takeshima H, Pavlovich A, Sachs N, Pruitt JL, Silveira I, Ross CA, Margolis RL, Rudnicki

- 1544 DD (2012): Loss of junctophilin-3 contributes to Huntington disease-like 2 pathogenesis.  
1545 *Ann Neurol* 71:245-57.
- 1546 Shao L, Vawter MP (2008): Shared gene expression alterations in schizophrenia and bipolar  
1547 disorder. *Biol Psychiatry* 64:89-97.
- 1548 Shoshan-Barmatz V, Ben-Hail D, Admoni L, Krelm Y, Tripathi SS (2015): The mitochondrial  
1549 voltage-dependent anion channel 1 in tumor cells. *Biochim Biophys Acta* 1848: 2547-75.
- 1550 Sims R, Hollingworth P, Moskvina V, Dowzell K, O'Donovan MC, Powell J, Lovestone S,  
1551 Brayne C, Rubinsztein D, Owen MJ, Williams J, Abraham R (2009): Evidence that variation  
1552 in the oligodendrocyte lineage transcription factor 2 (OLIG2) gene is associated with  
1553 psychosis in Alzheimer's disease. *Neurosci Lett* 461: 54-9.
- 1554 Sisek-Šprem M, Križaj A, Jukić V, Milošević M, Petrović Z, Herceg M (2015): Testosterone  
1555 levels and clinical features of schizophrenia with emphasis on negative symptoms and  
1556 aggression. *Nord J Psychiatry* 69:102-9.
- 1557 Srinivasan S, Bettella F, Hassani S, Wang Y, Witoelar A, Schork AJ, Thompson WK, Collier  
1558 DA, Desikan RS, Melle I, Dale AM, Djurovic S, Andreassen OA. (2017): Probing the  
1559 association between early evolutionary markers and schizophrenia. *PLoS One* 12:e0169227.
- 1560 Srinivasan S, Bettella F, Mattingsdal M, Wang Y, Witoelar A, Schork AJ, Thompson WK,  
1561 Zuber V; Schizophrenia Working Group of the Psychiatric Genomics Consortium, The  
1562 International Headache Genetics Consortium, Winsvold BS, Zwart JA, Collier DA, Desikan  
1563 RS, Melle I, Werge T, Dale AM, Djurovic S, Andreassen OA (2016): Genetic markers of  
1564 human evolution are enriched in schizophrenia. *Biol Psychiatry* 80:284-92.
- 1565 St Pourcain B, Cents RA, Whitehouse AJ, Haworth CM, Davis OS, O'Reilly PF, Roulstone S,  
1566 Wren Y, Ang QW, Velders FP, Evans DM, Kemp JP, Warrington NM, Miller L, Timpson  
1567 NJ, Ring SM, Verhulst FC, Hofman A, Rivadeneira F, Meaburn EL, Price TS, Dale PS,  
1568 Pillas D, Yliherva A, Rodriguez A, Golding J, Jaddoe VW, Jarvelin MR, Plomin R, Pennell  
1569 CE, Tiemeier H, Davey Smith G (2014). Common variation near ROBO2 is associated with  
1570 expressive vocabulary in infancy. *Nat Commun* 5:4831.
- 1571 Steen RG, Mull C, McClure R, Hamer RM, Lieberman JA (2006): Brain volume in first-  
1572 episode schizophrenia: systematic review and meta-analysis of magnetic resonance imaging  
1573 studies. *Br J Psychiatry* 188:510-8.
- 1574 Stein CM, Schick JH, Gerry Taylor H, Shriberg LD, Millard C, Kundtz-Kluge A, Russo K,  
1575 Minich N, Hansen A, Freebairn LA, Elston RC, Lewis BA, Iyengar SK (2004): Pleiotropic  
1576 effects of a chromosome 3 locus on speech-sound disorder and reading. *Am J Hum Genet*  
1577 74:283-97.
- 1578 Stephane M, Kuskowski M, Gundel J (2014): Abnormal dynamics of language in  
1579 schizophrenia. *Psychiatry Res* 216:320-4.
- 1580 Stephane M, Pellizzer G, Fletcher CR, McClannahan K (2007): Empirical evaluation of  
1581 language disorder in schizophrenia. *J Psychiatry Neurosci* 32:250-8.
- 1582 Strauss GP, Keller WR, Koenig JI, Gold JM, Frost KH, Buchanan RW (2015): Plasma oxytocin  
1583 levels predict social cue recognition in individuals with schizophrenia. *Schizophr Res* 62:  
1584 47–51. Sun J, Tang Y, Lim KO, Wang J, Tong S, Li H, He B (2014): Abnormal dynamics  
1585 of EEG oscillations in schizophrenia patients on multiple time scales. *IEEE Trans Biomed*  
1586 *Eng* 61:1756-1764.
- 1587 Swillen A, Devriendt K, Legius E, Eyskens B, Dumoulin M, Gewillig M (1997): Intelligence  
1588 and psychosocial adjustment in velocardiofacial syndrome: A study of 37 children and  
1589 adolescents with 22q11.2 Deletion Syndrome. *J Med Genet* 34:453-8.
- 1590 Swillen A, Devriendt K, Legius E, Prinzie P, Vogels A, Ghesquiere P, Fryns JP (1999): The  
1591 behavioural phenotype in velo-cardio-facial syndrome (VCFS): from infancy to  
1592 adolescence. *Genet Couns* 10:79-88.

- 1593 Szklarczyk D, Franceschini A, Wyder S, Forslund K, Heller D, Huerta-Cepas J, Simonovic M,  
1594 Roth A, Santos A, Tsafou K.P, Kuhn M, Bork P, Jensen LJ, von Mering C (2015): STRING  
1595 v10: protein-protein interaction networks, integrated over the tree of life. *Nucleic Acids Res*  
1596 43:D447-52.
- 1597 Tabler JM, Rice CP, Liu KJ, Wallingford JB (2016): A novel ciliopathic skull defect arising  
1598 from excess neural crest. *Dev Biol* 417: 4-10.
- 1599 Takahashi T, Okabe S, Broin PÓ, Nishi A., Ye K, Beckert MV, Izumi T., Machida A, Kang G,  
1600 Abe S, Pena JL, Golden A., Kikusui T, Hiroi N (2016): Structure and function of neonatal  
1601 social communication in a genetic mouse model of autism. *Mol Psychiatry* 21:1208-14.
- 1602 Takahasi M, Okanoya K (2010): Song learning in wild and domesticated strains of white-  
1603 rumped munia, *Lonchura striata*, compared by cross-fostering procedures: domestication  
1604 increases song variability by decreasing strain-specific bias. *Ethology* 116:396-405.
- 1605 Tanimoto Y, Veistinen L, Alakurtti K, Takatalo M, Rice DP (2012): Prevention of premature  
1606 fusion of calvarial suture in *GLI-Kruppel* family member 3 (*Gli3*)-deficient mice by  
1607 removing one allele of Runt-related transcription factor 2 (*Runx2*). *J Biol Chem* 287:21429-  
1608 38.
- 1609 Teffer K, Semendeferi K (2012): Human prefrontal cortex: evolution, development, and  
1610 pathology. *Prog Brain Res* 195:191-218.
- 1611 Theofanopoulou C. (2016): Implications of oxytocin in human linguistic cognition: from  
1612 genome to phenome. *Front Neurosci* 10:271.
- 1613 Thomas J (2014): Self-domestication and Language Evolution. PhD thesis. Edinburgh,  
1614 University of Edinburgh.
- 1615 Trixler M, Tényi T, Csábi G, Szabó R (2001): Minor physical anomalies in schizophrenia and  
1616 bipolar affective disorder. *Schizophr Res* 52:195-201.
- 1617 Tunca Z, Kıvrırcık Akdede B, Özerdem A, Alkın T, Polat S, Ceylan D, Bayın M, Cengizçetin  
1618 Kocuk N, Şimşek S, Resmi H, Akan P (2015): Diverse glial cell line-derived neurotrophic  
1619 factor (GDNF) support between mania and schizophrenia: a comparative study in four major  
1620 psychiatric disorders. *Eur Psychiatry* 30:198-204.
- 1621 Van Lierde KM, Mortier G, Loeys B, Baudonck N, De Ley S, Marks LA, Van Borsel J (2007):  
1622 Overall intelligibility, language, articulation, voice and resonance characteristics in a child  
1623 with Shprintzen-Goldberg syndrome. *Int J Pediatr Otorhinolaryngol* 71:721-8.
- 1624 van Os J, Kapur S (2009): Schizophrenia. *Lancet* 374: 635–45.
- 1625 van Reeuwijk J, Maugeenre S, van den Elzen C, Verrips A, Bertini E, Muntoni F, Merlini L,  
1626 Scheffer H, Brunner HG, Guicheney P, van Bokhoven H (2006): The expanding phenotype  
1627 of *POMT1* mutations: from Walker-Warburg syndrome to congenital muscular dystrophy,  
1628 microcephaly, and mental retardation. *Hum Mutat* 27:453-9.
- 1629 Vercammen A, Skilleter AJ, Lenroot R, Catts SV, Weickert CS, Weickert TW (2013):  
1630 Testosterone is inversely related to brain activity during emotional inhibition in  
1631 schizophrenia. *PLoS One* 8:e77496.
- 1632 Vincentz JW, Casasnovas JJ, Barnes RM, Que J, Clouthier DE, Wang J, Firulli AB (2016):  
1633 Exclusion of *Dlx5/6* expression from the distal-most mandibular arches enables BMP-  
1634 mediated specification of the distal cap. *Proc Natl Acad Sci U S A* 113: 7563-8.
- 1635 von Tetzchner S, Fosse P, Elmerskog B (2013): Juvenile neuronal ceroid lipofuscinosis and  
1636 education. *Biochim Biophys Acta* 1832:1894-905.
- 1637 Walker E, Mittal V, Tessner K (2008): Stress and the hypothalamic pituitary adrenal axis in  
1638 the developmental course of schizophrenia. *Annu Rev Clin Psychol* 4:189-216.
- 1639 Walker EF, Walder DJ, Reynolds F (2001): Developmental changes in cortisol secretion in  
1640 normal and at-risk youth. *Dev Psychopathol* 13:721-32.

- 1641 Wang R, Chen CC, Hara E, Rivas MV, Roulhac PL, Howard JT, Chakraborty M, Audet JN,  
1642 Jarvis ED (2015): Convergent differential regulation of SLIT-ROBO axon guidance genes  
1643 in the brains of vocal learners. *J Comp Neurol* 523:892-906.
- 1644 Wegman J, Tyborowska A, Hoogman M, Arias Vásquez A, Janzen G (2016): The brain-  
1645 derived neurotrophic factor Val66Met polymorphism affects encoding of object locations  
1646 during active navigation. *Eur J Neurosci* doi: 10.1111/ejn.13416.
- 1647 Wilkins, AS, Wrangham RW, Fitch WT (2014): The “domestication syndrome” in mammals:  
1648 A unified explanation based on neural crest cell behavior and genetics. *Genetics* 197:795-  
1649 808.
- 1650 Williams HJ, Norton N, Peirce T, Dwyer S, Williams NM, Moskvina V, Owen MJ, O'Donovan  
1651 MC (2007): Association analysis of the glial cell line-derived neurotrophic factor (GDNF)  
1652 gene in schizophrenia. *Schizophr Res* 97:271-6.
- 1653 Wilson SL, Wilson JP, Wang C, Wang B, McConnell SK (2012): Primary cilia and Gli3  
1654 activity regulate cerebral cortical size. *Dev Neurobiol* 72: 1196-212.
- 1655 Wray A, Grace GW (2007): The consequences of talking to strangers: Evolutionary corollaries  
1656 of socio-cultural influences on linguistic form. *Lingua* 117:543-578.
- 1657 Xu T, Stephane M, Parhi KK (2012): Selection of abnormal neural oscillation patterns  
1658 associated with sentence-level language disorder in schizophrenia. *Conf Proc IEEE Eng*  
1659 *Med Biol Soc* 2012:4923-6.
- 1660 Xu T, Stephane M, Parhi KK (2013): Multidimensional analysis of the abnormal neural  
1661 oscillations associated with lexical processing in schizophrenia. *Clin EEG Neurosc.* 44:135-  
1662 143.
- 1663 Yamauchi K, Varadarajan SG, Li JE, Butler SJ (2013): Type Ib BMP receptors mediate the  
1664 rate of commissural axon extension through inhibition of cofilin activity. *Development* 140:  
1665 333-42.
- 1666 Yang H, Manya H, Kobayashi K, Jiao H, Fu X, Xiao J, Li X, Wang J, Jiang Y, Toda T, Endo  
1667 T, Wu X, Xiong H (2016): Analysis of phenotype, enzyme activity and genotype of Chinese  
1668 patients with POMT1 mutation. *J Hum Genet* 61:753-9.
- 1669 Yoshitsugu K, Yamada K, Toyota T, Aoki-Suzuki M, Minabe Y, Nakamura K, Sekine Y,  
1670 Suzuki K, Takei N, Itokawa M, Mori N, Yoshikawa T (2006): A novel scale including  
1671 strabismus and 'cuspidal ear' for distinguishing schizophrenia patients from controls using  
1672 minor physical anomalies. *Psychiatry Res* 145:249-58.
- 1673 Yuan A, Li W, Yu T, Zhang C, Wang D, Liu D, Xu Y, Li H, Yu S (2013): SOX10 rs139883  
1674 polymorphism is associated with the age of onset in schizophrenia. *J Mol Neurosci* 50:333-  
1675 8. Yüksel RN, Altunsoy N, Tikir B, Cingi Külük M, Unal K, Goka S, Aydemir C, Goka E  
1676 (2014): Correlation between total vitamin D levels and psychotic psychopathology in  
1677 patients with schizophrenia: therapeutic implications for add-on vitamin D augmentation.  
1678 *Ther Adv Psychopharmacol* 4:268-75.
- 1679 Zeidán-Chuliá F, de Oliveira BH, Casanova MF, Casanova EL, Noda M, Salmina AB,  
1680 Verkhatsky A (2016): Up-regulation of oligodendrocyte lineage markers in the cerebellum  
1681 of autistic patients: evidence from network analysis of gene expression. *Mol Neurobiol*  
1682 53:4019-25.
- 1683 Zhang D, Ighaniyan S, Stathopoulos L, Rollo B, Landman K, Hutson J, Newgreen D (2014):  
1684 The neural crest: a versatile organ system. *Birth Defects Res C Embryo Today* 102:275-98.
- 1685 Zhang XY (2016): BDNF polymorphisms are associated with cognitive performance in  
1686 schizophrenia patients versus healthy controls. *J Clin Psychiatry* 77:e1011-8.
- 1687 Zhou H, Hu S, Matveev R, Yu Q, Li J, Khaitovich P, Jin L, Lachmann M, Stoneking M, Fu Q,  
1688 Tang K (2015): A chronological atlas of natural selection in the human genome during the  
1689 past half-million years. *BioRxiv* doi: <http://dx.doi.org/10.1101/018929>.
- 1690
